1 A cullin-RING ubiquitin ligase promotes thermotolerance as part of  
2 the Intracellular Pathogen Response in *C. elegans*.

3

4 Johan Panek, Spencer S. Gang, Kirthi C. Reddy, Robert J. Luallen, Amitkumar Fulzele, Eric J.  
5 Bennett, Emily R. Troemel.

6 Division of Biological Sciences, Section of Cell and Developmental Biology, University of  
7 California, San Diego, La Jolla, CA 92093 USA.

8

9 **Corresponding author:**

10 Emily R. Troemel

11 **Address:** UC San Diego, 9500 Gilman Dr, #0349, 4205 Bonner Hall, La Jolla, CA 92093-0349

12 **Office phone:** 858-246-0708

13 **Email:** [etroemel@ucsd.edu](mailto:etroemel@ucsd.edu)

14

15 <https://orcid.org/0000-0002-6026-9875>

16 <https://orcid.org/0000-0003-2422-0473>

17

18 **Classification**

19 Major: Biological Sciences

20 Minor: Immunology and Inflammation.

21 **Keywords**

22 Proteostasis, Intracellular Pathogen Response, heat shock, *C. elegans*, cullin-RING ubiquitin  
23 ligase complex.

24 **Author Contributions**

25 **JP SG KR RL AF EB ET**

26 Designed research JP, SG, EB, ET; Performed research JP, SG, AF; Contributed new reagents  
27 or analytic tools SG, RL, KR, ET; Analyzed data JP, AF, SG; Wrote the paper JP, SG, AF, ET

28 **This PDF file includes:**

29 Main Text  
30 Figures 1 to 6

31

## 32 **Abstract**

33 Intracellular pathogen infection leads to proteotoxic stress in host organisms. Previously we  
34 described a physiological program in the nematode *C. elegans* called the Intracellular Pathogen  
35 Response (IPR), which promotes resistance to proteotoxic stress and appears to be distinct from  
36 canonical proteostasis pathways. The IPR is controlled by PALS-22 and PALS-25, proteins of  
37 unknown biochemical function, which regulate expression of genes induced by natural  
38 intracellular pathogens. We previously showed that PALS-22 and PALS-25 regulate the mRNA  
39 expression of the predicted ubiquitin ligase component cullin *cul-6*, which promotes  
40 thermotolerance in *pals-22* mutants. However, it was unclear whether CUL-6 acted alone, or  
41 together with other ubiquitin ligase components. Here we use co-immunoprecipitation studies  
42 paired with genetic analysis to define the cullin-RING ligase components that act together with  
43 CUL-6 to promote thermotolerance. First, we identify a previously uncharacterized RING domain  
44 protein in the TRIM family we named RCS-1, which acts as a core component with CUL-6 to  
45 promote thermotolerance. Next, we show that the Skp-related proteins SKR-3, SKR-4 and SKR-5  
46 act redundantly to promote thermotolerance with CUL-6. Finally, we screened F-box proteins that  
47 co-immunoprecipitate with CUL-6 and find that FBXA-158 promotes thermotolerance. In  
48 summary, we have defined the three core components and an F-box adaptor of a cullin-RING  
49 ligase complex that promotes thermotolerance as part of the IPR in *C. elegans*, which adds to our  
50 understanding of how organisms cope with proteotoxic stress.

## 51 **Significance Statement**

52 Intracellular pathogen infection in the nematode *Caenorhabditis elegans* induces a robust  
53 transcriptional response as the host copes with infection. This response program includes several  
54 ubiquitin ligase components that are predicted to function in protein quality control. In this study,  
55 we show that these infection-induced ubiquitin ligase components form a protein complex that  
56 promotes increased tolerance of acute heat stress, an indicator of improved protein homeostasis  
57 capacity. These findings show that maintaining protein homeostasis may be a critical component  
58 of a multifaceted approach allowing the host to deal with stress caused by intracellular infection.

59

## 60 **Main Text**

61

### 62 **Introduction**

63

64 Maintaining protein homeostasis (proteostasis) after exposure to environmental stressors is  
65 critical for organismal survival (1). Several signaling pathways have been identified that help  
66 organisms cope with stressors that perturb proteostasis. For example, elevated temperature  
67 triggers the conserved Heat Shock Response (HSR) pathway, which helps organisms survive the  
68 toxic effects of heat (2). The HSR upregulates expression of chaperones that help with refolding  
69 of misfolded proteins, to prevent the formation of protein aggregates and restore proteostasis (1).  
70 Disruptions of proteostasis and the formation of protein aggregates in humans are associated  
71 with severe neurodegenerative and age-related diseases, such as Alzheimer's and Huntington's  
72 diseases (1, 3–5).

73 Pathogen infection can perturb proteostasis and several studies in the nematode *Caenorhabditis*  
74 *elegans* have demonstrated intriguing connections between immune responses to extracellular  
75 pathogens and canonical proteostasis pathways (6–11). More recently, examining the *C. elegans*  
76 host response to intracellular pathogens has uncovered a novel stress response pathway that  
77 promotes proteostasis (12, 13). Microsporidia are intracellular, fungal-like pathogens that are the  
78 most common cause of infection of *C. elegans* in the wild, with *Nematocida parisii* being the most  
79 commonly found microsporidian species in *C. elegans* (14). *N. parisii* replicates inside the *C.*  
80 *elegans* intestine, and the infection is associated with hallmarks of perturbed proteostasis in the

81 host, such as the formation of large ubiquitin aggregates in the intestine (12). Interestingly, the  
82 host transcriptional response to this infection is very similar to the host transcriptional response to  
83 another natural intracellular pathogen of the *C. elegans* intestine, the Orsay virus (12, 15, 16).  
84 These molecularly distinct pathogens induce a common mRNA expression pattern in *C. elegans*  
85 that we termed the “Intracellular Pathogen Response” or IPR (13).

86 Functional insights into the IPR came from analysis of mutants that constitutively express IPR  
87 genes. Forward genetic screens identified two genes encoding proteins of unknown biochemical  
88 function called *pals-22* and *pals-25* that comprise an ON/OFF switch for the IPR, with wild-type  
89 *pals-25* acting as an activator of the IPR, which is repressed by wild-type *pals-22* (13, 17).  
90 Constitutive upregulation of IPR gene expression in *pals-22* loss-of-function mutants is  
91 accompanied by a rewiring of *C. elegans* physiology, including increased resistance against  
92 natural pathogens like *N. parisii* and the Orsay virus, as well as slowed growth and shortened  
93 lifespan. *pals-22* mutants also have increased proteostasis capacity characterized by improved  
94 thermotolerance and lowered levels of aggregated proteins (13). All of the *pals-22* mutant  
95 phenotypes are reversed in *pals-22 pals-25* loss-of-function double mutants (17). Interestingly,  
96 these phenotypes appear to be independent of canonical proteostasis factors (13), such as the  
97 transcription factors HSF-1 and DAF-16, which mediate the HSR (18), and the SKN-1/Nrf2  
98 transcription factor, which mediates the proteasomal bounceback response (17, 19). Instead, the  
99 proteostasis phenotypes of the IPR require a cullin gene called *cul-6*, which is transcriptionally  
100 regulated by *pals-22/pals-25* and by infection (13, 17). Cullins are components of multi-subunit E3  
101 ubiquitin ligases, which are enzymes that catalyze transfer of ubiquitin onto substrate proteins in  
102 order to alter their fate (20). Based on these findings we hypothesized that CUL-6-mediated  
103 ubiquitylation of target proteins may act as a protein quality control mechanism in the IPR to  
104 respond to proteotoxic stress.

105 CUL-6 belongs to the cullin-RING Ligase (CRL) superfamily, which is found throughout  
106 eukaryotes (21). CRLs are multi-subunit enzyme complexes, a subset of which are Skp, cullin, F-  
107 box (SCF) complexes consisting of four subunits: a RING-box/RBX protein, a Skp, a cullin and an  
108 F-box protein, which serves as a substrate adaptor. Interestingly, the SCF class of ubiquitin  
109 ligases appears to have undergone a significant expansion in the evolutionary lineage that gave  
110 rise to the nematode *C. elegans* (22, 23). For example, there are around 520 F-box proteins in  
111 the *C. elegans* genome (22), in comparison to around 68 in humans (24), 22 in *Drosophila* and 11  
112 in *Saccharomyces cerevisiae* (25). In addition, the number of core SCF components has  
113 increased in nematodes, with *C. elegans* having 22 Skp-related proteins in comparison to six in  
114 *Drosophila*, just one in *S. cerevisiae*, and one in humans (26). The SCF components upregulated  
115 as part of the IPR include not only *cul-6* as mentioned above, but also the Skp-related proteins  
116 *skr-3*, *skr-4* and *skr-5*, and several F-box proteins (12). If *cul-6* were functioning as part of a  
117 ubiquitin ligase complex to promote proteostasis as part of the IPR, it should be acting with *skrs*  
118 and other CRL components. Here we use a combination of biochemistry and genetics to describe  
119 how CUL-6 acts together with a RING domain protein, three Skp-related proteins and an F-box  
120 protein to promote proteostasis in *C. elegans*.

## 121 **Results**

### 122 ***The cullin CUL-6 acts in the intestine and pharynx to promote thermotolerance***

124 In comparison to wild-type animals, *pals-22* loss-of-function mutants have increased  
125 thermotolerance, which is reduced to wild-type levels in *pals-22; cul-6* double mutants (13). Our  
126 previous results indicated that *pals-22* regulates thermotolerance in the intestine, where it also  
127 regulates *cul-6* mRNA expression (13). Because *cul-6* is expressed in the both the intestine and  
128 the pharynx (Fig. 1A), we investigated where *cul-6* acts to promote thermotolerance. We  
129 designed tissue-specific rescue constructs with *cul-6* cDNA using the Mos1-mediated Single  
130 Copy Insertion (MosSCI) system (27), to drive expression of GFP-tagged versions of *cul-6* using  
131 intestinal (*vha-6p*) or pharyngeal promoters (*myo-2p*). Here we found that both the intestinal and

132 pharyngeal strains expressed GFP::CUL-6 with the expected tissue distribution pattern (Fig. 1A).  
133 We then crossed these tissue-specific CUL-6 MosSCI transgenes into *pals-22; cul-6* double  
134 mutants to test for rescue of thermotolerance. Here we found that expression of *cul-6* in either the  
135 intestine or the pharynx was sufficient to increase the thermotolerance of *pals-22; cul-6* double  
136 mutants (Fig. 1B).

137 Previous studies had only found a functional role for CUL-6 in a *pals-22* mutant background. Here  
138 we found that overexpression of CUL-6 from a multi-copy array (CUL-6 tagged at the C-terminus  
139 with GFP and 3xFLAG, surrounded by ~20kb endogenous regulatory region (28)) increased  
140 thermotolerance in a wild-type animal background (Fig. 1A and B). Furthermore, we found that  
141 either pharyngeal or intestinal expression of *cul-6* cDNA promoted thermotolerance in a wild type  
142 background (Fig. 1B). Importantly, transgenic strains with *vha-6* and *myo-2* promoters driving  
143 genes other than wild-type *cul-6* did not have increased thermotolerance (see text below, and Fig.  
144 1B). Thus, increased expression of *cul-6* in a wild-type background under its own promoter, or  
145 only in the intestine or only in the pharynx leads to increased thermotolerance.

146 We also generated a *myo-3p::cul-6* construct to determine whether expression in body wall  
147 muscle could promote thermotolerance. Here, we failed to recover *myo-3p::cul-6* transgenic  
148 animals after several rounds of germline injections, suggesting expression of CUL-6 in muscles  
149 may be lethal. To quantify this effect, we injected either red fluorescent protein markers together  
150 with *myo-3p::cul-6*, or red fluorescent protein markers alone (see Materials and Methods). Here  
151 we found none of the eggs expressing red fluorescent protein markers hatched when co-injected  
152 with *myo-3p::cul-6* (0/87), while more than half of the eggs hatched when injected with the red  
153 fluorescent protein markers alone (48/84). These results suggest that ectopic expression of CUL-  
154 6 in muscles is toxic.

155 The activity of cullin-RING ubiquitin ligases can be increased by neddylation, which is the process  
156 of conjugating the ubiquitin-like protein Nedd8 onto a cullin protein at a conserved lysine residue  
157 (29). To determine whether CUL-6 might be regulated by neddylation, we mutated the lysine  
158 residue that would likely be targeted for neddylation into an arginine, which would be predicted to  
159 disrupt neddylation (Fig. S1) (30). We used the MosSCI technique to generate a strain that  
160 contains this *vha-6p::cul-6(K673R)* transgene (expression visualized in Fig. 1A) and found that it  
161 could not rescue the thermotolerance of *pals-22; cul-6* mutants (Fig. 1B). Furthermore, unlike  
162 *vha-6p::cul-6(wild-type)*, the *vha-6p::cul-6(K673R)* transgene did not promote thermotolerance in  
163 a wild-type background. These results suggest that CUL-6 requires neddylation to promote  
164 thermotolerance, which is consistent with CUL-6 acting as part of a ubiquitin ligase complex.

### 165 **Co-immunoprecipitation/mass spectrometry analysis identifies CUL-6 binding partners**

166 Next we performed co-immunoprecipitation mass spectrometry (co-IP/MS) analysis to identify  
167 binding partners of CUL-6 (Dataset S1). Here we used the *C. elegans* strain with GFP::3xFLAG-  
168 tagged CUL-6, which is functional for thermotolerance (Fig. 1A). We also used similar  
169 GFP::3xFLAG-tagged strains for PALS-22 and PALS-25 (13, 17). Through analysis of binding  
170 partners for PALS-22 and PALS-25, we sought to obtain insight into their biochemical function,  
171 which is currently unknown. Two proteins, GFP::3xFLAG alone and an unrelated protein  
172 F42A10.5::GFP::3xFLAG, were added as controls for the co-IPs. For each strain used for co-  
173 IP/MS analysis we confirmed transgene expression using immunoblotting and microscopy. When  
174 we treated animals with the proteasome inhibitor Bortezomib to induce proteotoxic stress and IPR  
175 gene expression, we saw an increase in CUL-6 expression by both Western and microscopy  
176 analysis, as expected from previous studies (12, 17)(Fig. S2A and B). CUL-6 expression was  
177 seen most strongly in the pharynx and the anterior-most intestinal cells. PALS-22 and PALS-25  
178 were broadly expressed throughout animal and, consistent with previous studies, their expression  
179 was not affected by IPR activation (Fig. S2A and B) (17).

180 Co-IP/MS of PALS-22 identified 23 binding partners, including PALS-25 as one of the most highly  
181 enriched binding partners, as compared to co-IP/MS of control proteins (Fig. S3A). PALS-22 also  
182 physically associated with PALS-23, which is a PALS protein of unknown function, as well as with  
183 F26F2.1, which is a protein of unknown function previously shown to be induced by intracellular  
184 infection (12). Co-IP/MS of PALS-25 identified 7 binding partners, with PALS-22 being the most  
185 highly enriched hit when compared with co-IP/MS of either control protein (Fig. S3B). These  
186 reciprocal co-IP results suggest that PALS-22 and PALS-25 are in a physical complex together.

187 Co-IP/MS of CUL-6 identified 26 significant binding partners. These proteins included predicted  
188 SCF ubiquitin ligase components, such as the Skp-related protein SKR-3 and the F-box protein  
189 FBXA-158 (Fig. 2A and B). Additionally, 6 subunits of the 26S proteasome were identified (RPT-  
190 3, 4 and RPN-5, 6.1, 8, 9). An SCF ubiquitin ligase complex canonically contains an RBX RING  
191 box protein, which interacts with a cullin. *C. elegans* has two RBX proteins, RBX-1 and RBX-2,  
192 but neither of these proteins were identified as significant binding partners for CUL-6 in the co-  
193 IP/MS. Instead, we identified a single RING domain protein, C28G1.5. Because of results  
194 described below, we renamed C28G1.5 as RING protein acting with cullin and Skr proteins (RCS-  
195 1). Interestingly, *rsc-1* mRNA expression, like *cul-6* mRNA expression, is higher in *pals-22*  
196 mutants when compared to either wild-type animals (log<sub>2</sub> FC=2.81, adjusted p-value= 4.83E-08),  
197 or compared to *pals-22 pals-25* mutants (log<sub>2</sub> FC=2.10, adjusted p-value=3.898E-07) (17).

#### 198 ***RING domain protein RCS-1 acts with CUL-6 to promote thermotolerance in pals-22*** 199 ***mutants***

200 The *rsc-1* gene had no previously described role in *C. elegans* and has two isoforms: *rsc-1b* has  
201 a RING domain and a B-box domain, and *rsc-1a* has the RING domain only. The closest potential  
202 homolog of *rsc-1* in humans is the tripartite motif-containing protein 23 (TRIM23). The TRIM  
203 family is named for having three motifs (RING finger, B box domain, and coiled coil domain), and  
204 many TRIM proteins have E3 ubiquitin ligase activity (31). Phylogenetic analysis of the full-length  
205 RCS-1 (RCS-1B) indicated that it is part of the *C. elegans* TRIM protein family (Fig. 3A) (32), but  
206 several *C. elegans* proteins like the ADP-Ribosylation Factor related proteins (ARF-3 and ARF-6)  
207 are more closely related to TRIM23 than RCS-1. To determine the expression pattern of RCS-1  
208 we generated transgenic *C. elegans* containing a 3xFLAG and GFP tagged version of RCS-1 as  
209 a multi copy array under the control of its endogenous regulatory region (28). The resulting strain  
210 expressed GFP throughout the intestine of the worms, with particularly strong expression in the  
211 anterior-most intestinal cells (Fig. 3B), where CUL-6 is also expressed.

212 Next we used CRISPR-Cas9 to generate two independent deletion alleles of *rsc-1* (*jy84* and  
213 *jy105*), which we crossed into *pals-22* mutants (Fig. 3C). We found that, for both *rsc-1* alleles,  
214 *pals-22; rsc-1* double mutants had thermotolerance similar to wild-type animals, indicating that  
215 *rsc-1* is required for the increased thermotolerance of *pals-22* mutants (Fig. 3D and E). Similar to  
216 *cul-6*, *rsc-1* mutations had no effect in a wild-type background (Fig. 3D and E). If RCS-1 were  
217 acting in a SCF together with CUL-6, then loss of *rsc-1* would not further lower thermotolerance in  
218 a *pals-22; cul-6* mutants. Indeed, we found that *pals-22; cul-6; rsc-1* triple mutants had a similar  
219 level of thermotolerance to *pals-22; cul-6* mutants, as well as to *pals-22; rsc-1* mutants and wild-  
220 type animals. These findings, together with CUL-6 co-IP results and RCS-1::GFP expression  
221 pattern, are consistent with RCS-1 being the RING domain protein that acts with CUL-6 in a  
222 ubiquitin ligase complex.

#### 223 ***SKP-related proteins SKR-3, SKR-4 and SKR-5 act redundantly to promote*** 224 ***thermotolerance in pals-22 mutants***

225 In addition to a cullin and a RING protein, SCF ubiquitin ligase complexes contain a Skp protein.  
226 Expression of three Skp-related genes (*skr-3*, *skr-4* and *skr-5*) is upregulated by both intracellular  
227 infection and mutation of *pals-22*, similar to *cul-6* expression (12, 13). We previously found that  
228 mutation of either *skr-3*, *skr-4* or *skr-5* alone in a *pals-22* mutant background had no effect on

229 thermotolerance (Fig. 4A) (13). Therefore, we made all of the possible combinations of *skr-3*, *skr-*  
230 *4* and *skr-5* as double mutants and then crossed them into a *pals-22* mutant background to  
231 determine whether they may act redundantly. Here we found that *pals-22; skr-3 skr-5* and *pals-*  
232 *22; skr-5 skr-4* triple mutants had a significant reduction in thermotolerance compared to *pals-22*  
233 mutants, with levels similar to wild-type animals. In contrast, *pals-22; skr-3 skr-4* mutants had  
234 thermotolerance similar to *pals-22* mutants (Fig. 4B). These results indicate that either SKR-3,  
235 SKR-4, or SKR-5 can act together with CUL-6 in a SCF to promote thermotolerance, with SKR-5  
236 being the most important. Consistent with the idea that SKR-5 acts together with CUL-6 and  
237 RCS-1, we found that SKR-5::GFP::3xFLAG under control of endogenous regulatory regions is  
238 strongly expressed in the anterior-most cells of the intestine (Fig. 4C).

239 Our results indicated that CUL-6 overexpression in the intestine was sufficient to increase  
240 thermotolerance in a wild-type background (Fig. 1B). To investigate whether CUL-6 acts together  
241 with SKR proteins in this context, we crossed the *skr-3 skr-5* double mutant into the CUL-6  
242 overexpressing strain (*vha-6p::cul-6*). As predicted, the resulting strain had a thermotolerance  
243 phenotype comparable to wild-type animals, consistent with CUL-6 acting together with SKR  
244 proteins (Fig. 4D).

245 Next we sought to use RNA interference (RNAi) to further validate the redundancy of SKR  
246 proteins acting with CUL-6. However, we found that *pals-22* mutants do not have increased  
247 thermotolerance compared to wild-type animals when fed on the standard *E. coli* bacteria used  
248 for feeding RNAi (HT115) (Fig. S4A). This effect may be due to dietary differences between  
249 HT115 and the OP50 strain used for thermotolerance experiments described above (33).  
250 Therefore, we tested thermotolerance with an OP50 strain (R)OP50 that was modified to enable  
251 feeding RNAi studies (34). Here we found that *pals-22* mutant animals fed on these RNAi-  
252 competent OP50 bacteria (transformed with empty vector L4440) have increased  
253 thermotolerance compared to wild-type animals, which is restored back to wild-type levels in *pals-*  
254 *22; cul-6* mutants (Figure S4A). Using this system, we successfully knocked down expression of  
255 *cul-6* with RNAi as assessed by lowered CUL-6::GFP::3xFLAG transgene expression (Figure  
256 S4B and C). Here we found that *cul-6* RNAi suppressed the enhanced thermotolerance of *pals-22*  
257 mutants (Figure S4D). With this system, we then confirmed that *skr-3* and *skr-5* act redundantly  
258 to promote thermotolerance, as RNAi against *skr-3* suppressed thermotolerance of *pals-22; skr-5*  
259 double mutants but not in *skr-5* mutants (Fig. 4E).

#### 260 **Analysis of CUL-6, SKR-3,4,5 and RCS-1 in other phenotypes mediated by pals-22**

261 Previous analysis of IPR genes indicated that RNAi knock-down of *cul-6*, *skr-3* or *skr-5* increased  
262 susceptibility to intracellular infection in a sterile but otherwise wild-type background *C. elegans*  
263 strain (12). Here we investigated whether *cul-6* mutants, *skr-3 skr-5* or *skr-4 skr-5* double  
264 mutants, or *rsc-1* mutants could suppress the increased pathogen resistance of *pals-22* mutants  
265 to microsporidia. In contrast to the complete suppression we found for increased thermotolerance  
266 of *pals-22* mutants, we found only a minor suppression of pathogen resistance by these mutants  
267 in a *pals-22* mutant background (Fig. S5). We also found that mutations in *rsc-1*, *skr-3 skr-4*, *skr-*  
268 *3 skr-5*, or *skr-5 skr-4* did not suppress the slowed developmental rate in *pals-22* mutants, similar  
269 to *cul-6* (Fig. S6). Therefore, *cul-6*, *rsc-1*, and *skr-3,4,5* appear to be important for executing the  
270 thermotolerance phenotype of *pals-22* mutants, but not other phenotypes.

#### 271 **FBXA-158 acts with CUL-6 to promote thermotolerance in pals-22 mutants**

272 Next we sought to identify the F-Box protein that functions as a substrate adaptor with CUL-6,  
273 RCS-1 and SKR-3,4,5. Here we used RNAi to screen through the F-box proteins that were found  
274 to physically associate with CUL-6 from co-IP/MS. In addition to FBXA-158 and FBXA-75 as  
275 significant hits, there were other F-box proteins that we identified below the significance  
276 threshold, including FBXA-54, FBXA-188 and FBXA-11. Because there were RNAi clones  
277 available for *fbxa-158*, *fbxa-54*, *fbxa-188* and *fbxa-11* we used the (R)OP50 RNAi system to

278 screen these genes in a *pals-22* mutant background. When treated with RNAi, only *fbxa-158*  
279 showed significant suppression of the increased thermotolerance phenotype (Fig. 5A). To further  
280 validate the results from our initial screen we also tested *fbxa-158* RNAi in the CUL-6  
281 overexpression strain *vha-6p::cul-6*. Here, *fbxa-158* RNAi treatment similarly suppressed the *vha-*  
282 *6p::cul-6* increased thermotolerance phenotype (Fig. 5B). Moreover, when treated with *fbxa-158*  
283 RNAi, wild-type animals did not show further decreased thermotolerance, thus indicating that  
284 FBXA-158 is not acting independently from CUL-6 (Fig. 5B).

285 To confirm our RNAi results we used CRISPR-Cas9 to generate two independent deletion alleles  
286 of *fbxa-158* (*gy145* and *gy146*) and crossed them with *pals-22* mutants (Fig. 5C). When tested for  
287 thermotolerance, both *fbxa-158* deletion alleles suppressed the increased thermotolerance of  
288 *pals-22* mutants while in wild-type animals the survival rate was unchanged (Fig. 5D). Similar to  
289 *cul-6*, *rscs-1* and *skr-3,4,5*, *fbxa-158* mRNA expression is higher in *pals-22* mutants when  
290 compared to wild-type animals (log<sub>2</sub> FC=2.81, adjusted p-value= 4.83E-08), and in *pals-22*  
291 mutants compared to *pals-22 pals-25* mutants (log<sub>2</sub> FC=6.95, adjusted p-value=1.2349E-06)  
292 (17). *fbxa-158* expression is also enriched in the intestine (35). Together, these results indicate  
293 that FBXA-158 acts as an F-box adaptor protein in a CUL-6/RCS-1/SKR-3,4,5 ubiquitin ligase  
294 complex that promotes thermotolerance in *C. elegans*.

## 295 Discussion

296 Thermal stress is one of many types of proteotoxic stress that can impair organismal health and  
297 survival. Here we used a combination of genetics and biochemistry to broaden our understanding  
298 of a recently identified proteostasis pathway called the IPR, which enables animals to survive  
299 exposure to thermal stress in a manner distinct from the canonical heat shock response (HSR).  
300 Specifically, we demonstrate that overexpression of CUL-6/cullin alone promotes  
301 thermotolerance, and it can act in either the intestine or the pharynx of *C. elegans*. Importantly,  
302 we found that CUL-6 acts together with other ubiquitin ligase components, including a previously  
303 uncharacterized RING protein we named RCS-1, as well as the Skp-related proteins SKR-3,  
304 SKR-4, and SKR-5 and the F-box protein FBXA-158 (Fig. 6). We propose that this RCS-1/CUL-  
305 6/SKR-3,4,5/FBXA-158 ubiquitin ligase complex is able to target proteins for ubiquitin-mediated  
306 proteasomal degradation and that this activity is a critical part of the IPR program. Consistent with  
307 this model, our co-IP/MS identified several proteasomal subunits that interact with CUL-6 (Fig. 2).

308 We also investigated protein-protein interactions of the PALS-22 and PALS-25 proteins, which  
309 comprise an ON/OFF switch in the IPR that regulates mRNA expression of *cul-6*, *skr-3*, *skr-4*,  
310 *skr-5*, *rscs-1* and *fbxa-158*. Previous studies indicated that *pals-22* and *pals-25* are in the same  
311 operon and interact genetically, and our co-IP/MS studies indicate they also interact  
312 biochemically. Notably, the *pals* gene family has expanded in the *C. elegans* genome, with 39  
313 genes in *C. elegans*, in comparison to only 1 *pals* gene each in mouse and human (36). Although  
314 the divergent '*pals*' protein signature that defines PALS proteins is of unknown function, PALS-22  
315 does have weak homology with F-box proteins (36), leading to the speculative idea that PALS  
316 proteins function as adaptor proteins in ubiquitin ligase complexes.

317 Like the *pals* gene family, *C. elegans* has a greatly expanded repertoire of SCF ligase  
318 components. This expansion has been suggested to reflect the results of an arms race against  
319 intracellular pathogens, as SCF components are among the most rapidly diversifying genes in the  
320 *C. elegans* genome (23). The most dramatically expanded class of SCF components includes  
321 ~520 F-box adaptor proteins in *C. elegans* (22). *C. elegans* also has 22 SKR proteins, in  
322 comparison to only 1 Skp in humans, indicating there has been an expansion of core SCF  
323 components as well. Here we identified SKR-3 as a binding partner for CUL-6, which is consistent  
324 with previous 2-hybrid results (26). Interestingly, we found redundancy in the role of SKRs at the  
325 phenotypic level: either SKR-3, SKR-4 or SKR-5 appear capable of acting with CUL-6 to promote  
326 thermotolerance, with SKR-5 being the most important. We also found that FBXA-158, one of the  
327 two F-box proteins identified as binding partners of CUL-6 by co-IP/MS acts to promote

328 thermotolerance. Together, with the Skp-related proteins, the F-box protein are responsible for  
329 substrate specificity of the SCF (37). Hence the identification of FBXA-158 and SKR-3,4,5 as  
330 member of the complex will help in future studies to identify what specific proteins are  
331 ubiquitylated by a CUL-6 SCF.

332 Canonical CRLs contain an RBX protein as the RING domain protein, which interacts with both a  
333 cullin and an E2 ubiquitin ligase (21). However, our co-IP/MS studies with CUL-6 did not identify  
334 RBX-1 or RBX-2 as interacting partners for CUL-6, but rather identified RCS-1. Given our genetic  
335 and biochemical results, we propose that RCS-1 plays the same role as an RBX protein would in  
336 a canonical SCF complex (Fig. 6). RCS-1 does not have a clear human ortholog, but the closest  
337 human protein is TRIM23 (38). Interestingly, the TRIM family contains 68 genes in humans, many  
338 of which encode single subunit E3 ubiquitin ligases, including those that restrict viral infection,  
339 and regulate inflammatory signaling (31). *C. elegans* has 18 TRIM proteins, and they appear to  
340 have a simpler structure than human TRIM proteins, given that absence of additional motifs in the  
341 C-terminal domains normally found in the majority of mammalian TRIM proteins (32). If these  
342 other *C. elegans* TRIM proteins can act in SCF ligases like RCS-1, it suggests there may also be  
343 an expansion of the RING core SCF components in *C. elegans*, in addition to the previously  
344 described expansion of SKRs and adaptor proteins.

345 The role of CUL-6 in promoting thermotolerance was first demonstrated in *pals-22* mutants,  
346 where there is an upregulation of *cul-6* mRNA as well as several other SCF components,  
347 including *skr-3*, *skr-4*, *skr-5*, *rsc-1* and *fbxa-158* (13, 17). However, here we found that animals  
348 overexpressing only CUL-6, without overexpression of the other components of the SCF, have  
349 increased thermotolerance. One explanation for this result is that CUL-6 is the limiting factor in a  
350 SCF that promotes thermotolerance in the IPR. Consistent with this idea, other components of  
351 the complex like SKR-3,4,5 are functionally redundant for thermotolerance, so even basal  
352 expression level might be sufficient to build a functional SCF, once CUL-6 expression increases  
353 past a certain threshold level.

354 What substrate(s) is targeted by the RCS-1/CUL-6/SKR-3,4,5/FBXA-158 ubiquitin ligase  
355 complex? It is possible that the effects of this complex are mediated through targeting a single  
356 regulatory protein for ubiquitylation and degradation. For example, ubiquitylation of the DAF-2  
357 insulin receptor by the ubiquitin ligase CHIP can alter DAF-2 trafficking, and it appears that  
358 ubiquitylation of just this one target has significant effects on proteostasis in *C. elegans* (39). In  
359 contrast, CRL2 and CRL4 complexes in humans have recently been shown to target the C-  
360 termini of a large number of proteins for degradation as part of a newly identified protein quality  
361 control system (40, 41). Given the modular nature of the SCF ligase family, the large number of  
362 F-box substrate adaptor proteins in *C. elegans*, and the redundancy we found in the SKR-3,4,5  
363 proteins, it seems possible that there are multiple substrates and adaptors used in the IPR. An  
364 exciting possibility is that the IPR involves distinct CRLs that ubiquitylate several different targets  
365 to improve proteostasis and tolerance against environmental stressors, including infections.  
366 Identifying these factors will be the subject of future studies.

367

## 368 **Materials and Methods**

369

### 370 **Cloning and generation of *cul-6* tissue-specific rescue strains**

371 A full list of strains used in this study is in Table S1. A full list of constructs used in this study is in  
372 Table S2. To generate the *vha-6p::CUL-6* transgene (pET499), *vha-6p::SBP::3XFLAG*, *cul-6*  
373 cDNA, and the *unc-54* 3' UTR were assembled in pCFJ150 using Gateway LR. To generate *myo-2p::CUL-6*  
374 (pET686) and *myo-3p::CUL-6* (pET687) constructs, the promoters *myo-2p*, *myo-3p*  
375 and the pET499 linearized backbone without the *vha-6p* promoter were amplified by PCR from  
376 pCFJ90, pCFJ104 and pET499, respectively and assembled by Gibson recombination (42). To  
377 generate the *cul-6(K673R)* construct (pET688) a 86 bp single strand oligonucleotide and a  
378 linearized pET499 backbone that had been amplified by PCR were assembled by Gibson



379 recombination. To generate the *spp-5p::3XFLAG::GFP* (pET555) transgene, *spp-*  
380 *5p::3XFLAG::GFP* and *let-858* 3' UTR were assembled in pCFJ150 using Gateway LR. Mos1-  
381 mediated Single Copy Insertion (MosSCI) was performed as described previously (27). Briefly,  
382 the plasmid of interest (25 ng/μl) was injected with pCFJ601 (50 ng/μl), pMA122 (10 ng/μl), pGH8  
383 (10 ng/μl), pCFJ90 (2.5 ng/μl), and pCFJ104 (5 ng/μl) into the EG6699 strain. Injected animals  
384 were incubated at 25°C for 7 days and then subjected to heat shock for 2h at 34°C. After 5 h non-  
385 Unc animals were selected and the presence of the insertion was verified by PCR and  
386 sequencing.

387 Transgenic strains with TransgeneOme fosmids (Table S2) were generated as extrachromosomal  
388 arrays (28) by injecting into *ttTi5605*; *unc-119(ed3)* worms (strain EG6699) and then selecting  
389 non-Unc worms.

### 390 ***Lethality scoring of myo-3p::cul-6 tissue-specific rescue strains***

391 To score the lethality of *myo-3p::cul-6* expression, worms were injected with a complete MosSCI  
392 mix (see above) containing either *myo-3p::cul-6* as the plasmid of interest, or water. Injected  
393 animals were incubated at 25°C and after 1 day, eggs expressing red fluorescence were  
394 transferred onto new plate at 25°C for 24 h. The hatching ratio of transferred eggs was then  
395 scored for both conditions. The assay was repeated two independent times.

### 396 ***Thermotolerance assays***

397 Animals were grown on standard NGM plates at 20°C. L4 stage animals were transferred onto  
398 fresh NGM plates seeded with OP50-1 and then subjected to heat shock for 2 h at 37.5°C. The  
399 plates were then placed in a single layer on a benchtop at room temperature for 30 min, and then  
400 transferred to a 20°C incubator. Then, 24 h later the survival was scored in a blinded manner.  
401 Worms not responding to touch were scored as dead, and 30 worms were scored per plate.  
402 Three replicate plates were scored for each strain per experiment, and each experiment was  
403 performed at least three independent times. Statistical significance was tested using one-way  
404 ANOVA and Tukey's HSD for *post-hoc* multiple comparisons.

### 405 ***Co-immunoprecipitation***

406 Each sample for co-IP/MS was prepared in 3 independent experimental replicates. For each  
407 sample, 200,000 synchronized L1 animals were transferred onto NGM plates and grown for 48 h  
408 at 20°C. Bortezomib was added to reach a final concentration of 22 μM or the equivalent volume  
409 of DMSO for the control plates. After 6 h at 20°C worms were washed off of the plates with M9,  
410 washed twice with M9, resuspended in 500 μl of ice-cold lysis buffer (50mM HEPES, pH7.4, 1mM  
411 EGTA, 1mM MgCl<sub>2</sub>, 100mM KCl, 1% glycerol, 0.05% NP40, 0.5mM DTT, 1x protease inhibitor  
412 tablet) and immediately frozen dropwise in liquid N<sub>2</sub>. Frozen pellets were ground into powder with  
413 a pre-chilled mortar and pestle. Protein extracts were spun for 15 min 21,000g at 4°C and  
414 supernatants were filtered on 0.45 μm filters (Whatman). Protein concentration was determined  
415 using Pierce 660nm protein assay and adjusted to 1 μg/μl with fresh lysis buffer. 1 mg of each  
416 sample was mixed with 25 μl of ANTI-FLAG M2 Affinity Gel (Sigma) and incubated at 4°C with  
417 rotation (12 rpm) for 1h. The resin was washed twice with 1 ml lysis buffer, twice with 1 ml lysis  
418 buffer for 5min, twice with 1 ml wash buffer (50mM HEPES, pH7.4, 1mM MgCl<sub>2</sub>, 100mM KCl)  
419 and 20min with 1 ml wash buffer with rotation. The liquid was removed and the beads were then  
420 stored at -80°C.

### 421 ***Trypsin digestion***

422 The immunoprecipitated proteins bound to the beads were digested overnight in 400 ng trypsin  
423 (Sigma, V511A) in 25 mM ammonium bicarbonate (Sigma) at 37°C. Samples were then reduced  
424 with 1mM final concentration of Dithiothreitol (DTT, Acros Organics) for 30min and alkylated with

425 5mM final concentration of Iodoacetamide (IAA, MP Biomedicals, LLC) for 30min in dark. The  
426 peptides were extracted from the beads by adding 50  $\mu$ L of 5% Formic acid (Sigma). The  
427 extraction was repeated one more time and the eluted peptides were combined. Digested  
428 peptides were desalted using Stage-Tip, C18 peptide cleanup method. The eluates were vacuum  
429 dried, and peptides were reconstituted in 15  $\mu$ L of 5% Formic acid, 5% Acetonitrile solution for  
430 LC-MS-MS analysis.

#### 431 **LC-MS-MS Analysis**

432 Samples were analyzed in triplicate by LC-MS-MS using an EASY-nLC 1000 HPLC (Thermo  
433 Scientific) and Q-Exactive mass spectrometer (Thermo Scientific, San Jose, CA) as described  
434 previously (43) with the following modifications. The peptides were eluted using a 60min  
435 acetonitrile gradient (45 min 2%-30% ACN gradient, followed by 5 min 30-60% ACN gradient, a  
436 2min 60-95% ACN gradient, and a final 8min isocratic column equilibration step at 0% ACN) at  
437 250nL/minute flow rate. All the gradient mobile phases contained 0.1% formic acid. The data  
438 dependent analysis (DDA) was done using top 10 method with a positive polarity, scan range  
439 400-1800 m/z, 70,000 resolution, and an AGC target of 3e6. A dynamic exclusion time of 20 s  
440 was implemented and unassigned, singly charged and charge states above 6 were excluded for  
441 the data dependent MS/MS scans. The MS2 scans were triggered with a minimum AGC target  
442 threshold of 1e5 and with maximum injection time of 60 ms. The peptides were fragmented using  
443 the normalized collision energy (NCE) setting of 25. Apex trigger and peptide match settings were  
444 disabled.

#### 445 **Peptide and Protein Identification and Quantification**

446 The RAW files obtained from the MS instrument were converted into mzXML format. The  
447 SEQUEST search algorithm was used to search MS/MS spectra against the concatenated target  
448 decoy database comprised of forward and reverse, reviewed *C. elegans* FASTA sequences from  
449 Uniprot (downloaded on 6/8/2015) along with GFP and *E. coli* sequences appended in the same  
450 file. The search parameters used were as follows: 20 ppm peptide mass tolerance; 0.01 Da  
451 fragment ion tolerance; Trypsin (1 1 KR P) was set as the enzyme; maximum 2 missed cleavages  
452 were allowed; Oxidation on methionine (15.99491 Da) and n-term acetylation (42.01056 Da) were  
453 set as differential modifications; static modification (57.02146 Da) was set on cysteine for alkyl  
454 modification. Peptide matches were filtered to a peptide false discovery rate (FDR) of 2% using  
455 the linear discrimination analysis. The protein level matches were filtered at 2% FDR using the  
456 protein sieve analysis. The spectral counts from the triplicates were then summed and used for  
457 the data analysis.

#### 458 **Analysis of mass spectrometry data**

459 Peptide spectral counts were used to calculate fold change ratio, p-value and adjusted p-value  
460 between sample IPs and control IPs (GFP and F42A10.5) using the DEP package in R (44).  
461 Briefly the data were filtered to keep only the peptides present in at least two replicates in one  
462 condition. Filtered data were normalized using Variance Stabilizing Normalization. Missing values  
463 were imputed using the MiniProb method from the DEP package by randomly selecting values  
464 from a Gaussian distribution centered on a minimal value of the dataset. Fold change ratio and  
465 adjusted p-values were calculated. Proteins with adjusted  $P < 0.05$  and log2 fold change  $> 1$  in  
466 comparison with at least one of the controls were considered as significant. Any protein with a  
467 negative log2 fold change with one control or the other (*i.e.* more affinity to the control protein  
468 than the tested bait) was considered as non-significant.

#### 469 **Phylogenetic analysis of RCS-1**

470 Amino acid sequences of 15 proteins were aligned using MUSCLE (version 3.7) and trimmed with  
471 trimAl (version 1.3) (45) using phylemon2 online platform (46). Bayesian Markov chain Monte

472 Carlo inference (LG + I + G + F) was performed using BEAST (version 1.10.4) (47). Analysis was  
473 run using a Yule model tree prior, an uncorrelated relaxed clock (lognormal distribution) and a  
474 chain length of 10 million states sampled every 1,000 iterations. Results were assessed with  
475 Tracer (version 1.7.1), maximum clade credibility tree was built after a 25% burn-in. Posterior  
476 probability values greater than 0.5 are marked on branch labels.

#### 477 **CRISPR deletions of *rsc-1* and *fbxa-158***

478 To generate deletions of *rsc-1* and *fbxa-158*, a co-CRISPR strategy was used, adapted from the  
479 IDT proposed method for *C. elegans*. To generate the ~2.18 kb deletion alleles of *rsc-1* we  
480 designed two crRNA encompassing the whole *rsc-1* locus (crRNA1: 5'-  
481 GTTTGTTGAAGGAAATGCACAGG-3', crRNA2: 5'-GGTTTCCTATAGCTGTGACACGG-3').  
482 These two oligonucleotides were synthesized by IDT and used with a crRNA targeting the *dpy-10*  
483 gene (*dpy-10* crRNA3: 5'-GCTACCATAGGCACCACGAG-3') and assembled with commercial  
484 tracrRNA (50  $\mu$ M crRNA1 and crRNA2, 25  $\mu$ M *dpy-10* crRNA, and 40  $\mu$ M tracrRNA). After an  
485 annealing step for 5 min at 95°C, the resulting guide RNA mixture was added to CAS9-NLS  
486 protein (27  $\mu$ M final – ordered from QB3 Berkeley) and microinjected into N2 worms. F1 Dpy  
487 progeny were screened by PCR, confirmed by sequencing for a deletion and positive lines were  
488 backcrossed 4 times to the N2 background before testing. The same co-CRISPR strategy was  
489 used to generate the ~1.65 kb deletion alleles of *fbxa-158*. Two crRNAs encompassing the whole  
490 *fbxa-158* locus (crRNA1: 5'-ATAGTCGGGTACAAAACAAATGG-3', crRNA2:  
491 CTACTIONCATCTTTAAGAACACGG-3') were used with the same *dpy-10* crRNA and assembled  
492 as described above. Deletion positive lines were backcrossed 2 times to the N2 background  
493 before testing.

#### 494 **RNA interference assays**

495 RNA interference assays were performed using the feeding method. Overnight cultures of HT115  
496 or OP50 strain (R)OP50 modified to enable RNAi (34) (gift from Meng Wang lab, Baylor College  
497 of Medicine) were plated on RNAi plates (NGM plates supplemented with 5 mM IPTG, 1 mM  
498 carbenicillin) and incubated at 20°C for 3 days. Gravid adults were transferred to these plates,  
499 and their F1 progeny (L4 stage) were transferred onto new RNAi plates before being tested for  
500 thermotolerance as previously described.

#### 501 **Western blot analysis**

502 For each strain, 1500 synchronized L1 worms were placed on NGM plates seeded with OP50  
503 bacteria and incubated at 20°C for 48 h. These animals were then treated with Bortezomib (22  
504  $\mu$ M final) or control DMSO for 6 h and washed off the plate with M9. Proteins were extracted in  
505 lysis buffer (50 mM HEPES, pH7.4, 1 mM EGTA, 1 mM MgCl<sub>2</sub>, 100 mM KCl, 1% glycerol, 0.05%  
506 NP40, 0.5 mM DTT, 1x protease inhibitor tablet) as previously described (13). Protein levels were  
507 determined using the Pierce 660nm assay. Equal amount of proteins (5  $\mu$ g) were boiled in protein  
508 loading buffer, separated on a 5-20% SDS-PAGE precast gel (Bio-Rad) and transferred onto  
509 PVDF membrane. Nonspecific binding was blocked using 5% nonfat dry milk in PBS-Tween  
510 (0.1%) for 1 hour at room temperature. The membranes were incubated with primary antibodies  
511 overnight at 4°C (mouse anti-FLAG diluted 1:1,000 and mouse anti-Tubulin diluted 1:7,500),  
512 washed 5 times in PBS-Tween and blotted in horseradish peroxidase-conjugated secondary  
513 antibodies at room temperature for 2 h (Goat anti-mouse diluted 1:10,000). Membranes were  
514 then washed 5 times in PBS-Tween, treated with ECL reagent (Amersham), and imaged using a  
515 Chemidoc XRS+ with Image Lab software (Bio-Rad).

#### 516 **Fluorescence microscopy**

517 For *cul-6*, *rsc-1* and *skr-5* tissue-specific expression lines shown in Fig. 1, Fig. 3 and Fig. 4,  
518 respectively, images were taken using a Zeiss LSM700 confocal microscope with 10X and 40X

519 objectives. For the expression analysis of GFP::3xFLAG-tagged proteins PALS-22, PALS-25,  
520 CUL-6 and F42A10.5 in Fig S2, image were taken with a Zeiss LSM700 confocal microscope with  
521 10X objective. For RNAi knock-down in Fig. S4, L4 stage F1 progeny of ERT422 worms fed with  
522 OP50 expressing *cul-6* RNAi were anesthetized using 10  $\mu$ M levamisole in M9 buffer and  
523 mounted on 2% agarose pads for imaging with a Zeiss LSM700 confocal. Using ImageJ software  
524 (version 1.52e), GFP signal in the pharynx and the first intestinal cells ring was measured, as well  
525 as three adjacent background regions. The total corrected fluorescence (TCF) was calculated as  
526 TCF = integrated density – (area of selected cell  $\times$  mean fluorescence of background readings).  
527 For each condition, 30 worms were imaged. Significance was assessed with a Student's t-test.

### 528 **Measurement of developmental rate**

529 40 – 50 gravid adults were transferred onto standard 10 cm NGM plate and incubated at 20°C to  
530 lay eggs for 2h before being removed. These plates were incubated at 20°C and the proportion of  
531 eggs that hatched and developed into L4's was scored at 48 h, 64 h, and 72 h by scoring 100  
532 animals each replicate.

533

### 534 **Acknowledgments**

535

536 We thank Vladimir Lazetic, Ivana Sfaric, Jessica Sowa, and Eillen Teclé for comments on the  
537 manuscript. This work was supported by NIH under R01 AG052622 to ERT and EJB, and a  
538 Burroughs Wellcome Fund Investigators in the Pathogenesis of Infectious Diseases fellowship to  
539 ERT.

540

### 541 **References**

542

- 543 1. J. Labbadia, R. I. Morimoto, The biology of proteostasis in aging and disease. *Annu. Rev.*  
544 *Biochem.* **84**, 435–64 (2015).
- 545 2. R. Gomez-Pastor, E. T. Burchfiel, D. J. Thiele, Regulation of heat shock transcription  
546 factors and their roles in physiology and disease. *Nat. Rev. Mol. Cell Biol.* **19**, 4–19  
547 (2017).
- 548 3. M. S. Hipp, S.-H. H. Park, F. U. Hartl, Proteostasis impairment in protein-misfolding and -  
549 aggregation diseases. *Trends Cell Biol.* **24**, 1–9 (2014).
- 550 4. R. C. Taylor, A. Dillin, Aging as an Event of Proteostasis Collapse. *Cold Spring Harb.*  
551 *Perspect. Biol.* **3**, a004440–a004440 (2011).
- 552 5. N. Kourtis, N. Tavernarakis, Cellular stress response pathways and ageing: intricate  
553 molecular relationships. *EMBO J.* **30**, 2520–2531 (2011).
- 554 6. E. J. Tillman, *et al.*, Endoplasmic Reticulum Homeostasis Is Modulated by the Forkhead  
555 Transcription Factor FKH-9 During Infection of *Caenorhabditis elegans*. *Genetics* **210**,  
556 1329–1337 (2018).
- 557 7. V. Singh, A. Aballay, Heat-shock transcription factor (HSF)-1 pathway required for  
558 *Caenorhabditis elegans* immunity. **103** (2006).
- 559 8. M. W. Pellegrino, *et al.*, Mitochondrial UPR-regulated innate immunity provides resistance  
560 to pathogen infection. *Nature* **516**, 414–7 (2014).
- 561 9. A. Mohri-Shiomi, D. A. Garsin, Insulin signaling and the heat shock response modulate  
562 protein homeostasis in the *Caenorhabditis elegans* intestine during infection. *J. Biol.*  
563 *Chem.* **283**, 194–201 (2008).

- 564 10. J. Miles, R. Scherz-Shouval, P. van Oosten-Hawle, Expanding the Organismal  
565 Proteostasis Network: Linking Systemic Stress Signaling with the Innate Immune  
566 Response. *Trends Biochem. Sci.* (2019) <https://doi.org/10.1016/j.tibs.2019.06.009>.
- 567 11. D. O'Brien, *et al.*, A PQM-1-Mediated Response Triggers Transcellular Chaperone  
568 Signaling and Regulates Organismal Proteostasis. *Cell Rep.* **23**, 3905–3919 (2018).
- 569 12. M. Bakowski, *et al.*, Ubiquitin-Mediated Response to Microsporidia and Virus Infection in  
570 *C. elegans*. *PLoS Pathog.* **10** (2014).
- 571 13. K. C. Reddy, *et al.*, An Intracellular Pathogen Response Pathway Promotes Proteostasis  
572 In *C. elegans*. *Curr. Biol.* (2017) <https://doi.org/10.1016/j.cub.2017.10.009> (August 28,  
573 2017).
- 574 14. G. Zhang, *et al.*, A Large Collection of Novel Nematode-Infecting Microsporidia and Their  
575 Diverse Interactions with *Caenorhabditis elegans* and Other Related Nematodes. *PLoS*  
576 *Pathog.* **12**, e1006093 (2016).
- 577 15. P. Sarkies, A. Ashe, J. Le Pen, M. A. McKie, E. A. Miska, Competition between virus-  
578 derived and endogenous small RNAs regulates gene expression in *Caenorhabditis*  
579 *elegans*. *Genome Res.* **23**, 1258–1270 (2013).
- 580 16. K. Chen, C. J. Franz, H. Jiang, Y. Jiang, D. Wang, An evolutionarily conserved  
581 transcriptional response to viral infection in *Caenorhabditis* nematodes. *BMC Genomics*  
582 **18**, 303 (2017).
- 583 17. K. C. Reddy, *et al.*, Antagonistic paralogs control a switch between growth and pathogen  
584 resistance in *C. elegans*. *PLOS Pathog.* **15**, e1007528 (2019).
- 585 18. A.-L. Hsu, C. T. Murphy, C. Kenyon, Regulation of Aging and Age-Related Disease by  
586 DAF-16 and Heat-Shock Factor. *Science (80-. )*. **300**, 1142–1145 (2003).
- 587 19. X. Li, *et al.*, Specific SKN-1/Nrf stress responses to perturbations in translation elongation  
588 and proteasome activity. *PLoS Genet.* **7**, 9–11 (2011).
- 589 20. N. Zheng, N. Shabek, Ubiquitin Ligases: Structure, Function, and Regulation. *Annu. Rev.*  
590 *Biochem.* **86**, 129–157 (2017).
- 591 21. M. D. Petroski, R. J. Deshaies, Function and regulation of cullin–RING ubiquitin ligases.  
592 *Nat. Rev. Mol. Cell Biol.* **6**, 9–20 (2005).
- 593 22. J. H. Thomas, Adaptive evolution in two large families of ubiquitin-ligase adapters in  
594 nematodes and plants. *Genome Res.* **16**, 1017–30 (2006).
- 595 23. E. Kipreos, Ubiquitin-mediated pathways in *C. elegans*. *WormBook*, 1–24 (2005).
- 596 24. J. Jin, *et al.*, Systematic analysis and nomenclature of mammalian F-box proteins. *Genes*  
597 *Dev.* **18**, 2573–2580 (2004).
- 598 25. E. T. Kipreos, M. Pagano, The F-box protein family. *Genome Biol.* **1**, REVIEWS3002  
599 (2000).
- 600 26. S. Nayak, *et al.*, The *Caenorhabditis elegans* Skp1-related gene family: diverse functions  
601 in cell proliferation, morphogenesis, and meiosis. *Curr. Biol.* **12**, 277–87 (2002).
- 602 27. C. Frøkjær-Jensen, M. W. Davis, M. Ailion, E. M. Jorgensen, Improved Mos1-mediated

- 603 transgenesis in *C. elegans*. *Nat. Methods* **9**, 117–118 (2012).
- 604 28. M. Sarov, *et al.*, A genome scale resource for in vivo tag-based protein function  
605 exploration in *C. elegans*. *Cell* **150**, 855–866 (2012).
- 606 29. D. M. Duda, *et al.*, Structural Insights into NEDD8 Activation of Cullin-RING Ligases:  
607 Conformational Control of Conjugation. *Cell* **134**, 995–1006 (2008).
- 608 30. K. Wu, A. Chen, Z.-Q. Pan, Conjugation of Nedd8 to CUL1 Enhances the Ability of the  
609 ROC1-CUL1 Complex to Promote Ubiquitin Polymerization. *J. Biol. Chem.* **275**, 32317–  
610 32324 (2000).
- 611 31. S. Hatakeyama, TRIM Family Proteins: Roles in Autophagy, Immunity, and  
612 Carcinogenesis. *Trends Biochem. Sci.* **42**, 297–311 (2017).
- 613 32. M. Sardiello, S. Cairo, B. Fontanella, A. Ballabio, G. Meroni, Genomic analysis of the  
614 TRIM family reveals two groups of genes with distinct evolutionary properties. *BMC Evol.*  
615 *Biol.* **8**, 225 (2008).
- 616 33. S. Pang, S. P. Curran, Adaptive Capacity to Bacterial Diet Modulates Aging in *C. elegans*.  
617 *Cell Metab.* **19**, 221–231 (2014).
- 618 34. D. A. Lynn, *et al.*, Omega-3 and -6 fatty acids allocate somatic and germline lipids to  
619 ensure fitness during nutrient and oxidative stress in *Caenorhabditis elegans*. *Proc. Natl.*  
620 *Acad. Sci.* **112**, 15378–15383 (2015).
- 621 35. S. M. Lingala, M. G. M. Mhs. Ghany, Chromosomal clustering and GATA transcriptional  
622 regulation of intestine-expressed genes in *C. elegans*. **25**, 289–313 (2016).
- 623 36. E. Leyva-Díaz, *et al.*, Silencing of Repetitive DNA Is Controlled by a Member of an  
624 Unusual *Caenorhabditis elegans* Gene Family. *Genetics* **207**, genetics.300134.2017  
625 (2017).
- 626 37. J. R. Skaar, J. K. Pagan, M. Pagano, Mechanisms and function of substrate recruitment  
627 by F-box proteins. *Nat. Rev. Mol. Cell Biol.* **14**, 369–81 (2013).
- 628 38. D. M. Dawidziak, J. G. Sanchez, J. M. Wagner, B. K. Ganser-Pornillos, O. Pornillos,  
629 Structure and catalytic activation of the TRIM23 RING E3 ubiquitin ligase. *Proteins* **85**,  
630 1957–1961 (2017).
- 631 39. R. Tawo, *et al.*, The Ubiquitin Ligase CHIP Integrates Proteostasis and Aging by  
632 Regulation of Insulin Receptor Turnover. *Cell* **169**, 470–482.e13 (2017).
- 633 40. I. Koren, *et al.*, The Eukaryotic Proteome Is Shaped by E3 Ubiquitin Ligases Targeting C-  
634 Terminal Degrons. *Cell* **173**, 1622–1635.e14 (2018).
- 635 41. H.-C. Lin, *et al.*, C-Terminal End-Directed Protein Elimination by CRL2 Ubiquitin Ligases.  
636 *Mol. Cell* **70**, 602–613.e3 (2018).
- 637 42. D. G. Gibson, *et al.*, Enzymatic assembly of DNA molecules up to several hundred  
638 kilobases. *Nat. Methods* **6**, 343–345 (2009).
- 639 43. J. M. Gendron, *et al.*, Using the Ubiquitin-modified Proteome to Monitor Distinct and  
640 Spatially Restricted Protein Homeostasis Dysfunction. *Mol. Cell. Proteomics* **15**, 2576–93  
641 (2016).

- 642 44. X. Zhang, *et al.*, Proteome-wide identification of ubiquitin interactions using UbiA-MS. *Nat.*  
643 *Protoc.* **13**, 530–550 (2018).
- 644 45. S. Capella-Gutierrez, J. M. Silla-Martinez, T. Gabaldon, trimAl: a tool for automated  
645 alignment trimming in large-scale phylogenetic analyses. *Bioinformatics* **25**, 1972–1973  
646 (2009).
- 647 46. R. Sanchez, *et al.*, Phylemon 2.0: a suite of web-tools for molecular evolution,  
648 phylogenetics, phylogenomics and hypotheses testing. *Nucleic Acids Res.* **39**, W470–  
649 W474 (2011).
- 650 47. M. A. Suchard, *et al.*, Bayesian phylogenetic and phylodynamic data integration using  
651 BEAST 1.10. *Virus Evol.* **4**, vey016 (2018).

652

653

## 654 **Figures and Tables**

655

656 **Figure 1.** CUL-6 expression in the intestine or in the pharynx promotes thermotolerance. (A)  
657 Confocal fluorescence images of L4 or adult animals with *cul-6::GFP* transgenes driven by either  
658 the *vha-6* or *myo-2* promoter and integrated with MosSCI, or, in the case of *cul-6p::cul-6::GFP*,  
659 driven by the endogenous promoter and expressed from a multi-copy array (28). (B) Survival of  
660 animals after 2 h of 37.5°C heat shock treatment, followed by 24 h at 20°C. Strains were tested in  
661 triplicate experiments, with three plates per experiment, 30 animals per plate. The genotypes  
662 *myo-2p::APX::GFP* and *jyls8[pals-5p::GFP; myo-2p::mCherry]* were tested as controls for *myo-2p*  
663 driven expression. Each dot represents a plate and different shapes represent the experimental  
664 replicates done on different days. Mean fraction alive of the nine replicates is indicated by black  
665 bar with errors bars as SD. \*\*\*  $P < 0.001$ , one-way ANOVA with Tukey's *post-hoc* multiple  
666 comparisons test.

667 **Figure 2.** Co-immunoprecipitation mass spectrometry analysis identifies binding partners for  
668 CUL-6. Volcano plot of proteins significantly enriched in CUL-6 IP compared to F42A10.5 IP (A)  
669 or to GFP IP (B). Proteins significantly more abundant compared to either of the control IP's (GFP  
670 alone control or F42A10.5 control, at adjusted  $P < 0.05$  and log2 fold change  $> 1$ ) were  
671 considered interacting proteins (Dataset S1). Gray dots indicate non-significant proteins, red dots  
672 indicate significant proteins, green dots indicate significant SCF proteins and blue dots indicate  
673 significant proteasome subunits.

674 **Figure 3.** RING domain protein RCS-1 (C28G1.5) promotes thermotolerance in *pals-22* mutants.  
675 (A) Phylogenetic relationships of RCS-1 protein with TRIM23 homologs proteins (in red),  
676 canonical RBX proteins (in black) and known TRIM proteins (in blue – all are *C. elegans* except  
677 noted human gene). The tree was built from a protein alignment using the Bayesian MCMC  
678 method. Posterior probabilities are indicated on the branches. (B) Confocal fluorescence images

679 of L4 animals with *rsc-1::GFP* driven by the endogenous promoter and expressed from a multi-  
680 copy array (28). (C) *rsc-1* isoforms and exon/intron structures. Protein domains are colored in  
681 green and yellow. *jy84* and *jy105* are deletion alleles. (D and E) Survival of animals after 2 h of  
682 37.5°C heat shock treatment, followed by 24 h at 20°C. Strains were tested in triplicate  
683 experiments, with three plates per experiment, 30 animals per plate. Each dot represents a plate,  
684 and different shapes represent the experimental replicates done on different days. Mean fraction  
685 alive of the nine replicates is indicated by black bar with errors bars as SD. \*\*\*  $P < 0.001$ , one-  
686 way ANOVA with Tukey's *post-hoc* multiple comparisons test.

687 **Figure 4.** SKR-3, SKR-4 and SKR-5 act redundantly to promote thermotolerance in *pals-22*  
688 mutants. (A) *skr-3*, *skr-4* and *skr-5* gene exon/intron structure. *ok365* and *ok3068* are deletion  
689 alleles, *gk759439* is a premature stop mutation. (B) Survival of animals after 2 h of 37.5°C heat  
690 shock treatment, followed by 24 h at 20°C. \*\*\*  $P < 0.001$ , one-way ANOVA with Tukey's *post-hoc*  
691 multiple comparisons test.  $n = 9$  replicates per strain. (C) Confocal fluorescence images of L4  
692 animals with *skr-5::GFP* driven by the endogenous promoter and expressed from a multi-copy  
693 array (28). (D) Survival of animals after 2 h of 37.5°C heat shock treatment, followed by 24 h at  
694 20°C. \*\*\*  $P < 0.001$ , \*\*  $P < 0.01$ , one-way ANOVA with Tukey's *post-hoc* multiple comparisons  
695 test.  $n = 7$  replicates per strain. (E) Survival of animals after 2 h of 37.5°C heat shock treatment,  
696 followed by 24 h at 20°C. *skr-5* and *pals-22*; *skr-5* mutants were fed on (R)OP50 expressing  
697 either L4440 (control vector) or *skr-3* RNAi. \*\*\*  $P < 0.001$ , two-way ANOVA with Sidak's multiple  
698 comparisons test.  $n = 9$  replicates per condition. For (B, D and E) strains were tested in triplicate  
699 experiments, 30 animals per plate. Mean fraction alive of the replicates is indicated by black bar  
700 with errors bars as SD. Each dot represents a plate, and different shapes represent the  
701 experimental replicates done on different days.

702 **Figure 5.** FBXA-158 promotes thermotolerance in *pals-22* mutants. (A) Survival of animals after 2  
703 h of 37.5°C heat shock treatment, followed by 24 h at 20°C. *pals-22* mutants were fed on  
704 (R)OP50 expressing either L4440 (control vector) or RNAi for the indicated genes. *pals-22*  
705 mutants were tested in duplicate experiments, with two plates per experiment, 30 animals per  
706 plate. \*\*\*  $P < 0.001$ , \*\*  $P < 0.01$ , one-way ANOVA with Tukey's *post-hoc* multiple comparisons  
707 test. (B) Survival of animals after 2 h of 37.5°C heat shock treatment, followed by 24 h at 20°C.  
708 Wild type and *vha-6p::cul-6* animals were fed on (R)OP50 expressing either L4440 (control  
709 vector), *cul-6* or *fbxa-158* RNAi. Strains were tested in quadruplicate experiments, with three  
710 plates per experiment, 30 animals per plate. \*\*\*  $P < 0.001$ , \*  $P < 0.05$ , two-way ANOVA with  
711 Sidak's multiple comparisons test. (C) *fbxa-158* isoforms and exon/intron structures. *jy145* and  
712 *jy146* are deletion alleles. (D) Survival of animals after 2 h of 37.5°C heat shock treatment,  
713 followed by 24 h at 20°C. \*\*\*  $P < 0.001$ , one-way ANOVA with Tukey's *post-hoc* multiple



714 comparisons test. (*A*, *B* and *D*) each dot represents a plate, and different shapes represent the  
715 experimental replicates done on different days. Mean fraction alive of the replicates is indicated  
716 by black bar with errors bars as SD.

717 **Figure 6.** Model for a RCS-1/CUL-6/SKR/FBXA-158 ubiquitin ligase that promotes proteostasis.

718

Figure 1

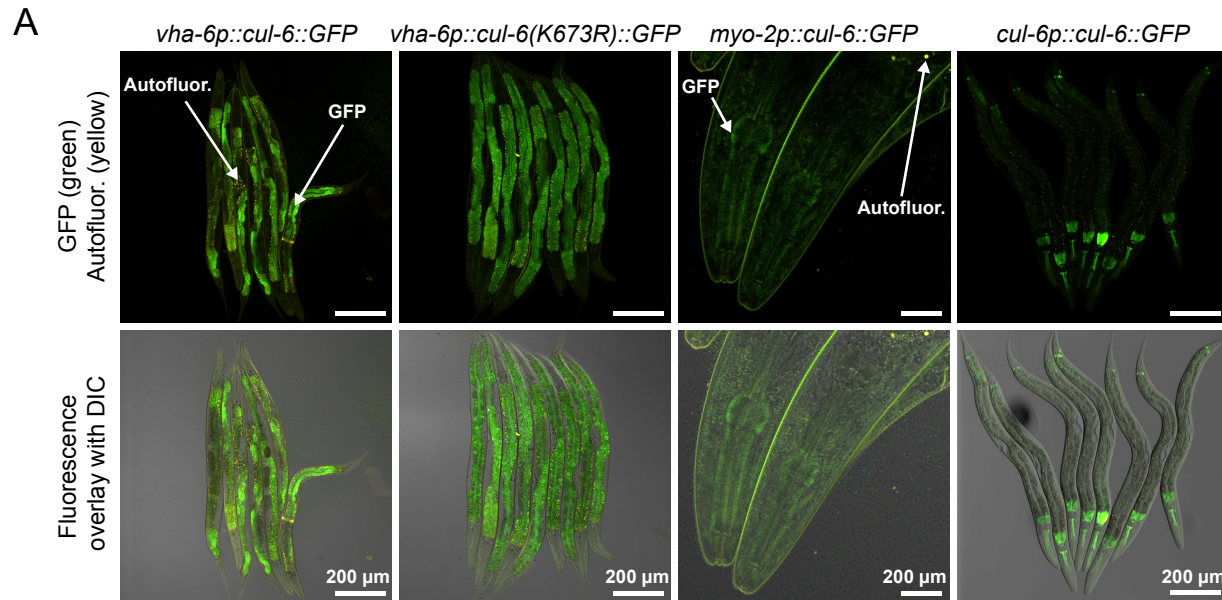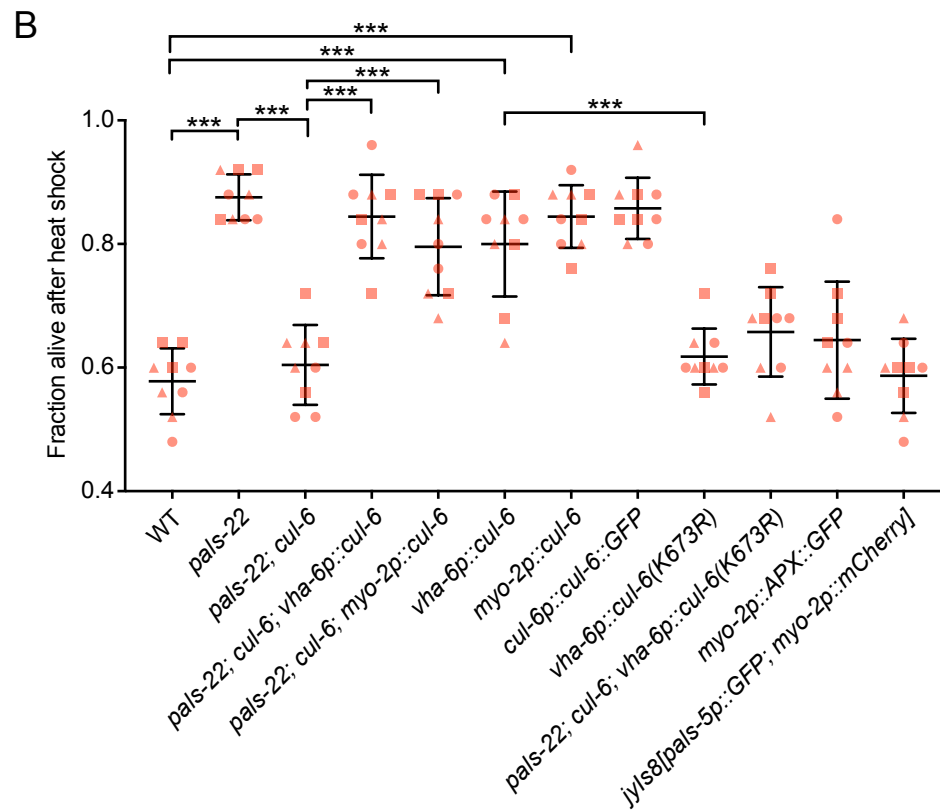

Figure 2

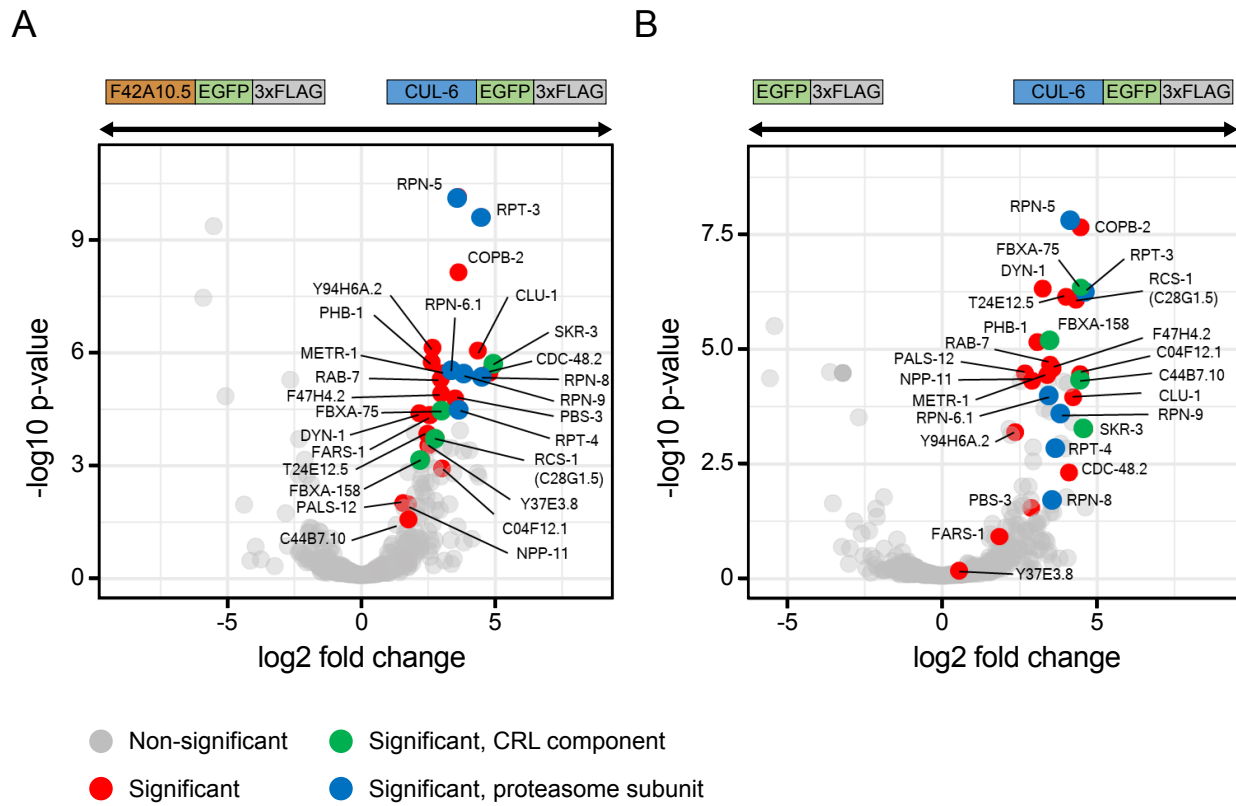

Figure 3

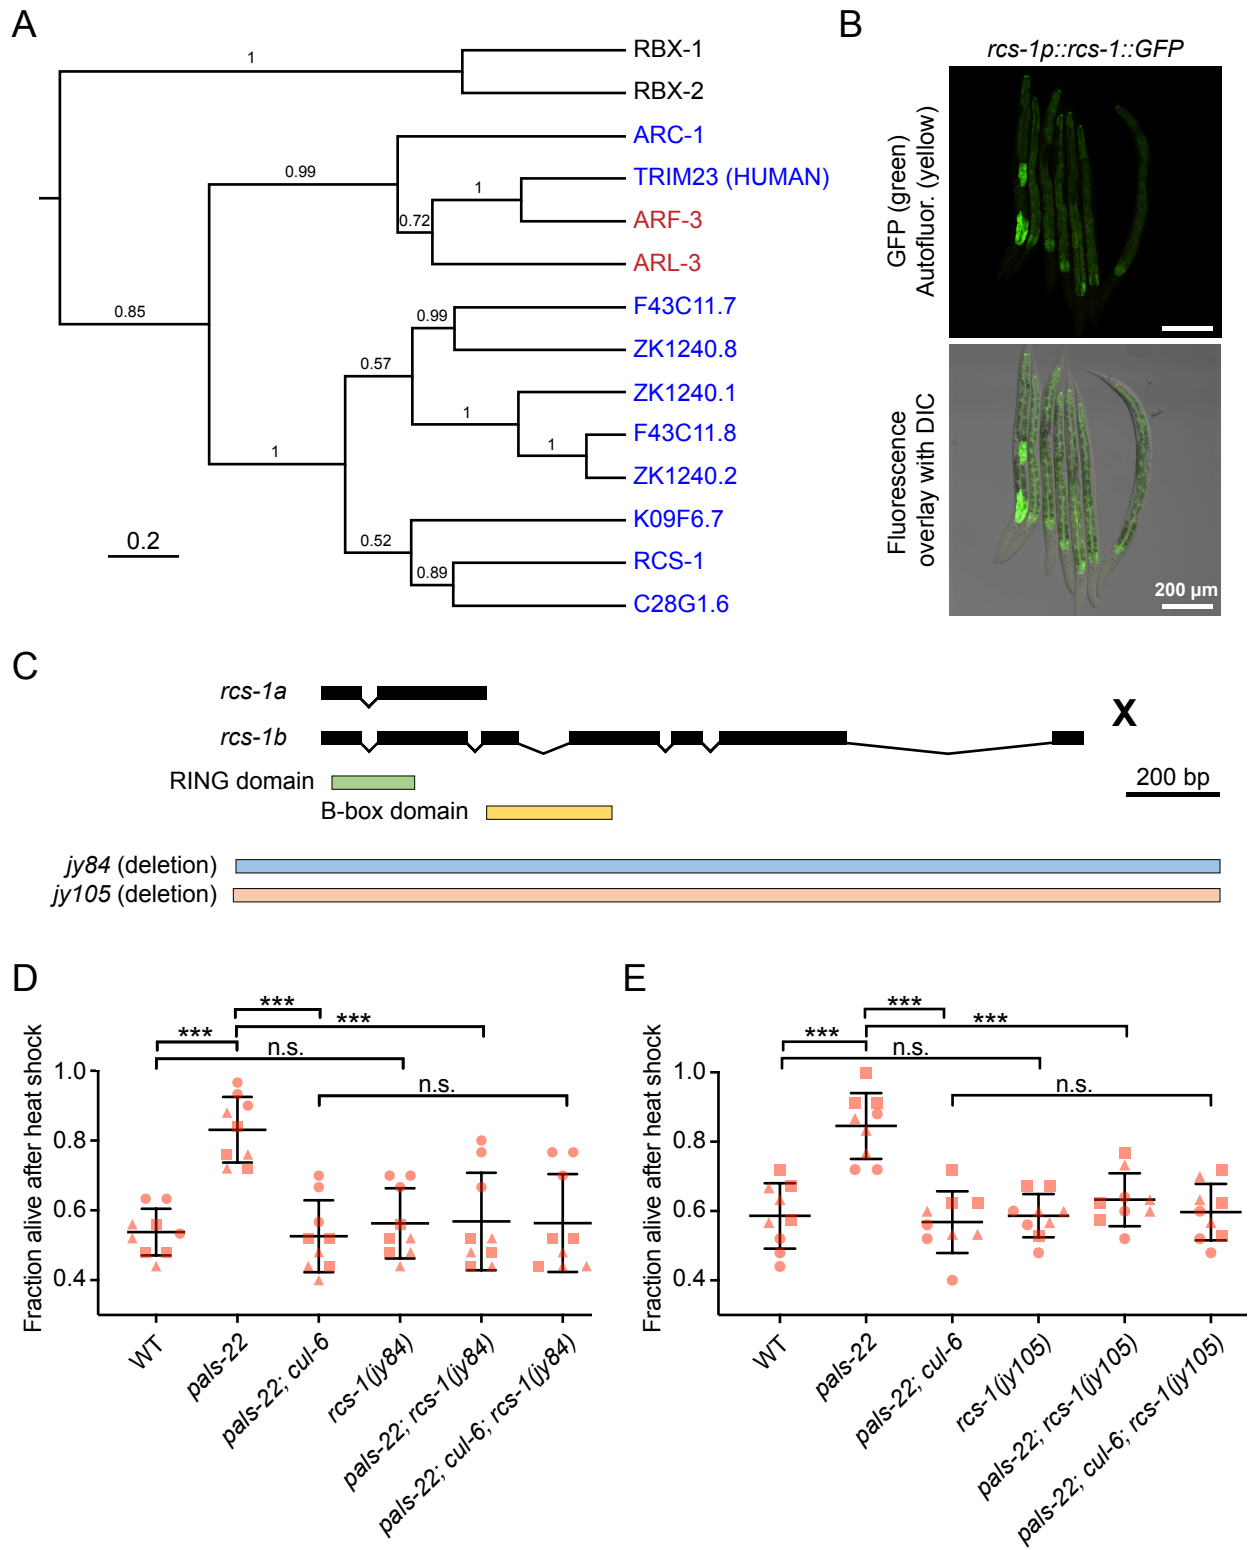

Figure 4

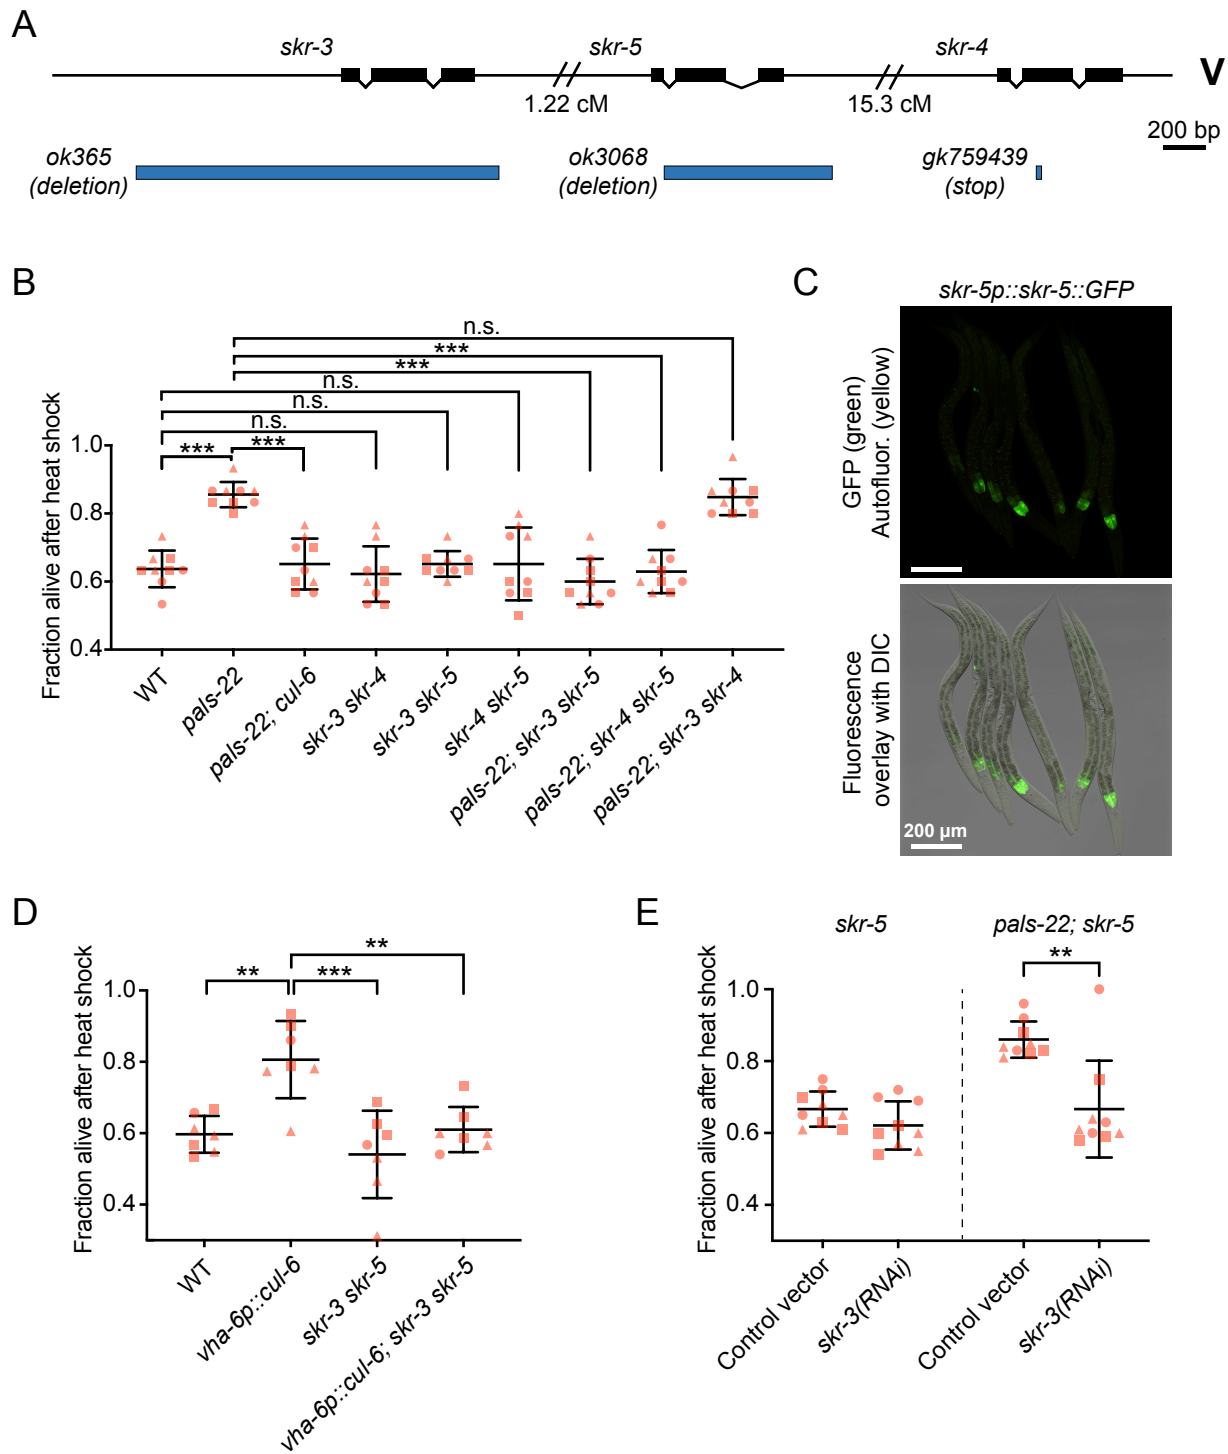

Figure 5

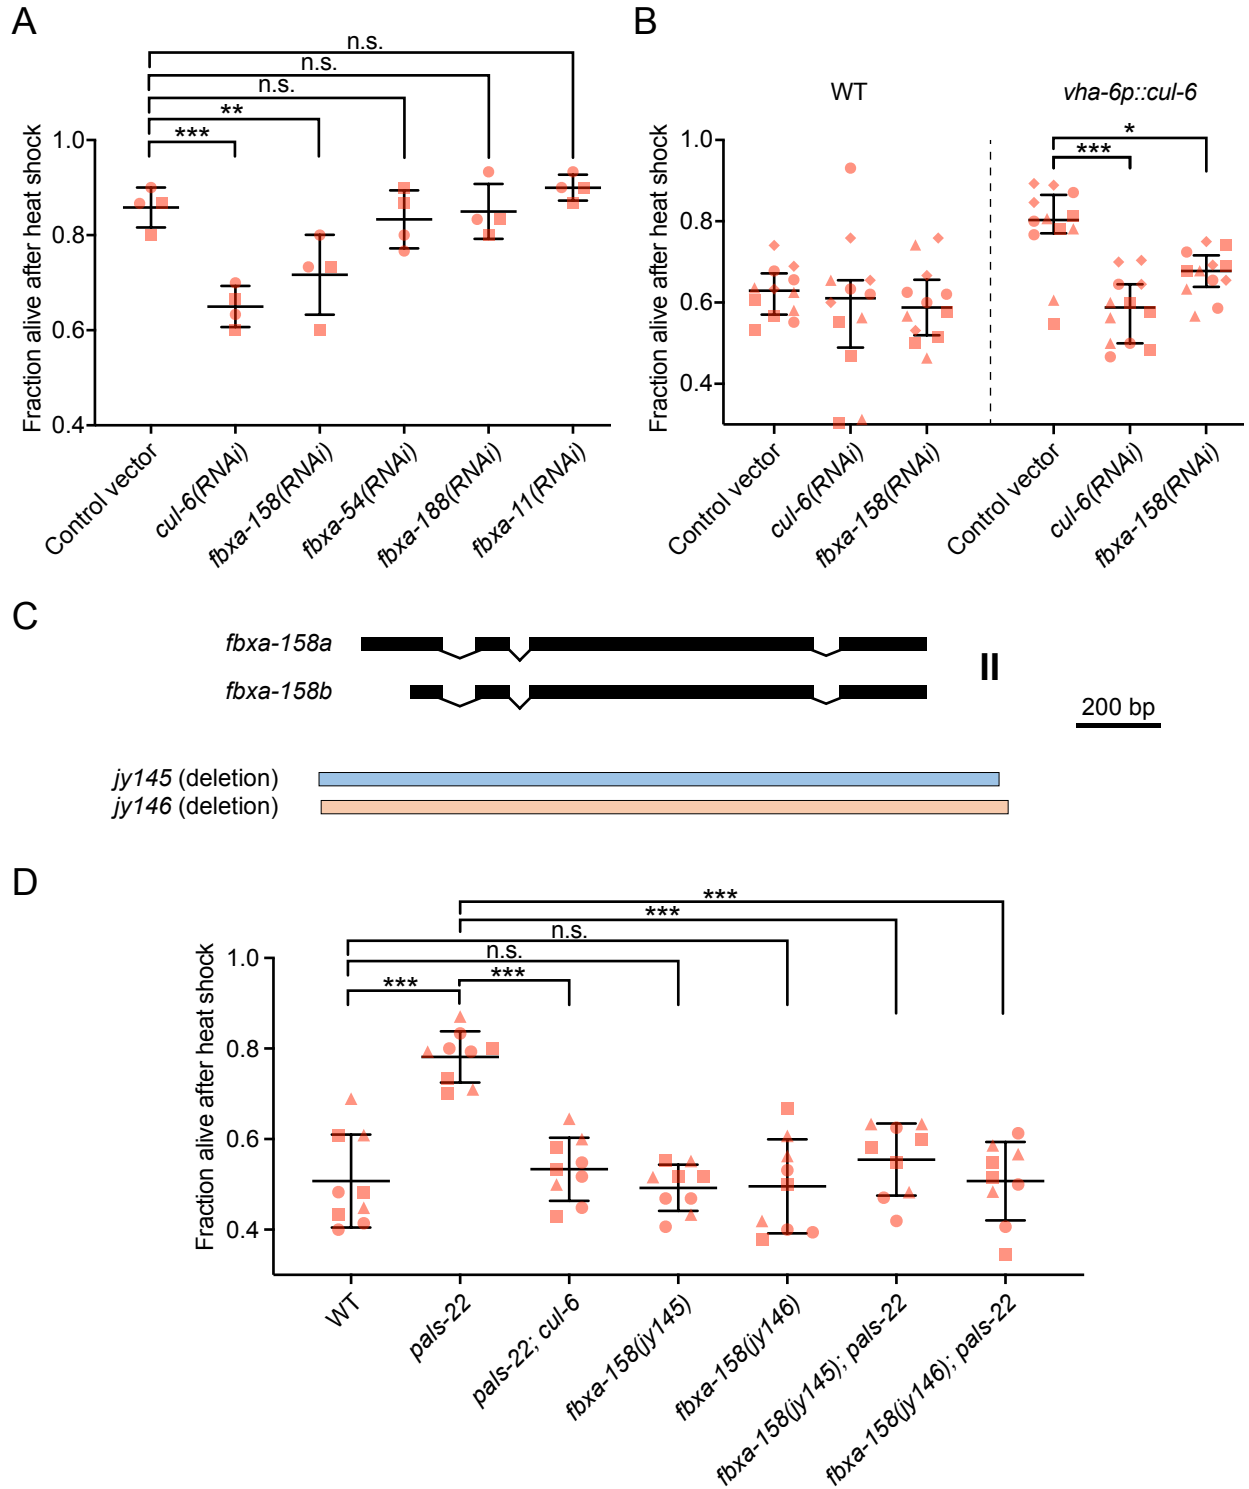

Figure 6

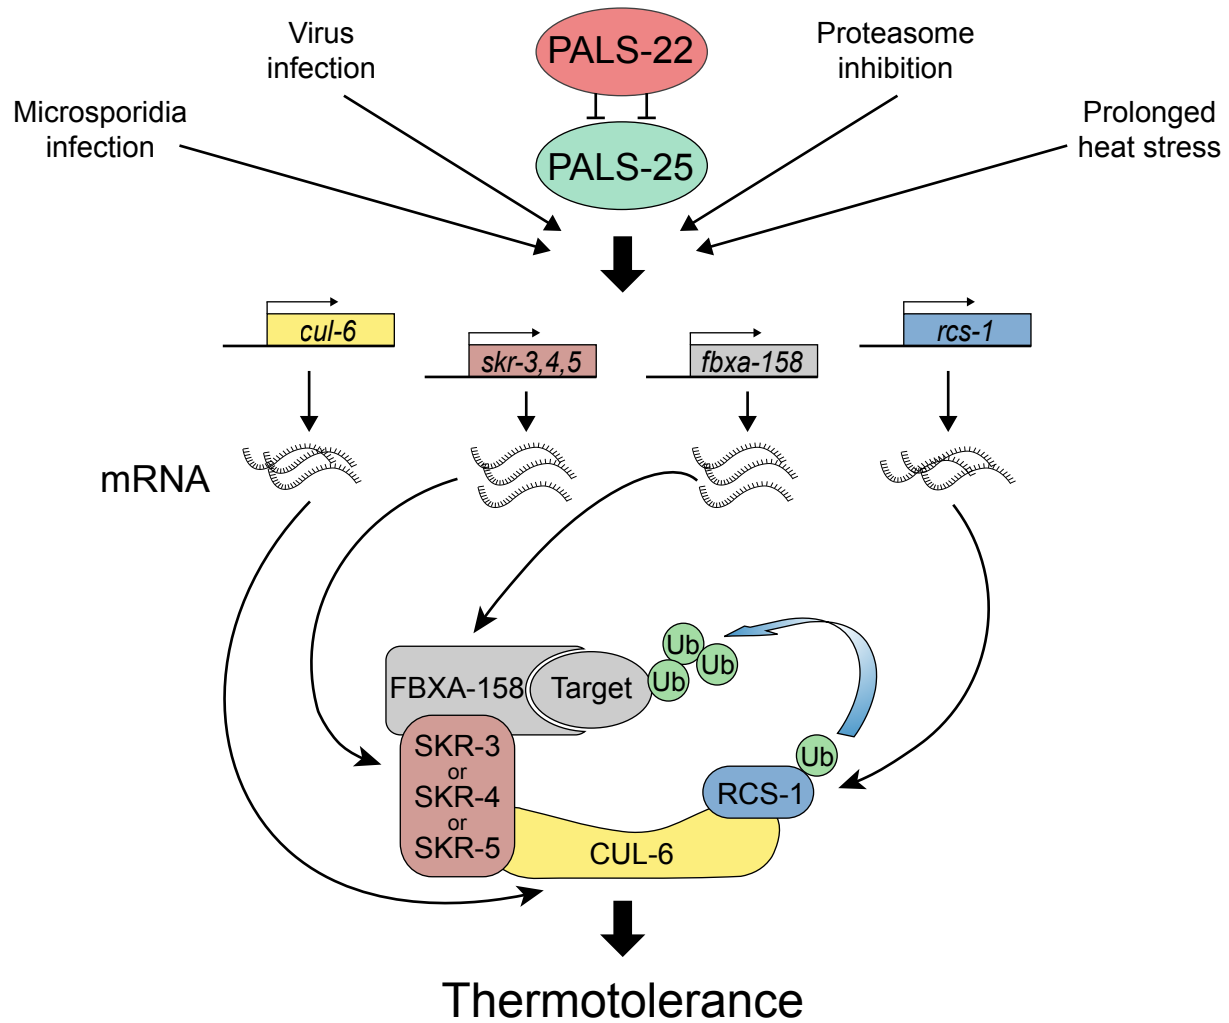

**Supplementary Information for:**

A cullin-RING ubiquitin ligase promotes thermotolerance as part of the Intracellular Pathogen Response in *C. elegans*.

Johan Panek, Spencer S. Gang, Kirthi C. Reddy, Robert J. Luallen, Amitkumar Fulzele, Eric J. Bennett, Emily R. Troemel.

Emily R. Troemel  
Email: [etroemel@ucsd.edu](mailto:etroemel@ucsd.edu)

**This PDF file includes:**

Figures S1 to S6  
Table S1 to S2  
Legend for Dataset S1  
SI References

**Other supplementary materials for this manuscript include the following:**

Dataset S1



Neddylation site

Consensus - - - - - A - I V R I M K - - - - - H

CUL-6 (*C. elegans*) T D A V Q N T V E S D R K Y E I K A C I V R I M K T R K S L T H

CUL-1 (*C. elegans*) T E N V Q K N V E E D R K S V I S A C I V R I M K T R K R V Q H

CUL-1 (*Homo sapiens*) Q E T T H K N I E E D R K L L I Q A A I V R I M K M R K V L K H

CDC53 (*Saccharomyces cerevisiae*) T A S S V D T Y D N E I V M E L S A I I V R I M K T E G K L S H

**Fig. S1.** Alignment of the C-terminal region of *cul-6* with other cullin genes. The conserved lysine residue targeted by neddylation is indicated by a red circle.

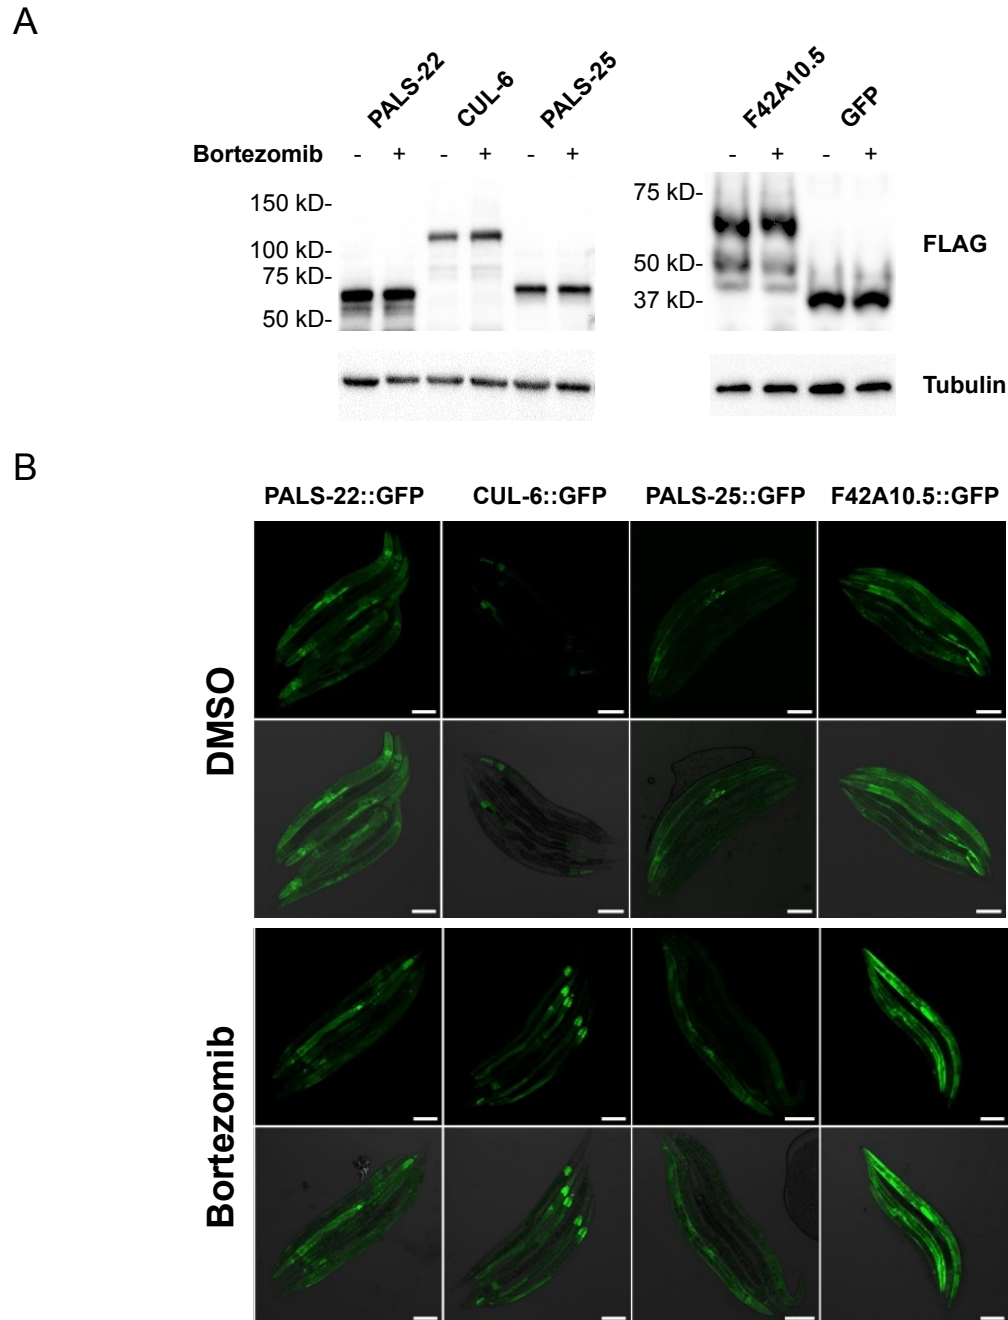

**Fig. S2.** Expression analysis of GFP::3xFLAG-tagged proteins used for Co-IP/MS studies. (A) Western blot analysis of total protein lysate from transgenic adult animals containing fosmid transgenes expressing GFP::3xFLAG tagged protein and treated with Bortezomib or DMSO as diluent control. Proteins were detected with anti-FLAG, and anti-tubulin antibody was used as a loading control. Expected sizes; CUL-6::GFP::3xFLAG (116 kD), PALS-22::GFP::3xFLAG (64.8 kD), PALS-25 GFP::3xFLAG (66.9 kD), F42A10.5::GFP::3xFLAG (61.3 kD), GFP-3::FLAG (34 kD). (B) Confocal fluorescence images of L4 animals with fosmid transgenes expressing GFP tagged proteins from endogenous promoters, after exposure to DMSO or Bortezomib (diluted in DMSO). Images are overlays of green and phase contrast channels. Scale bar is 100  $\mu$ m.

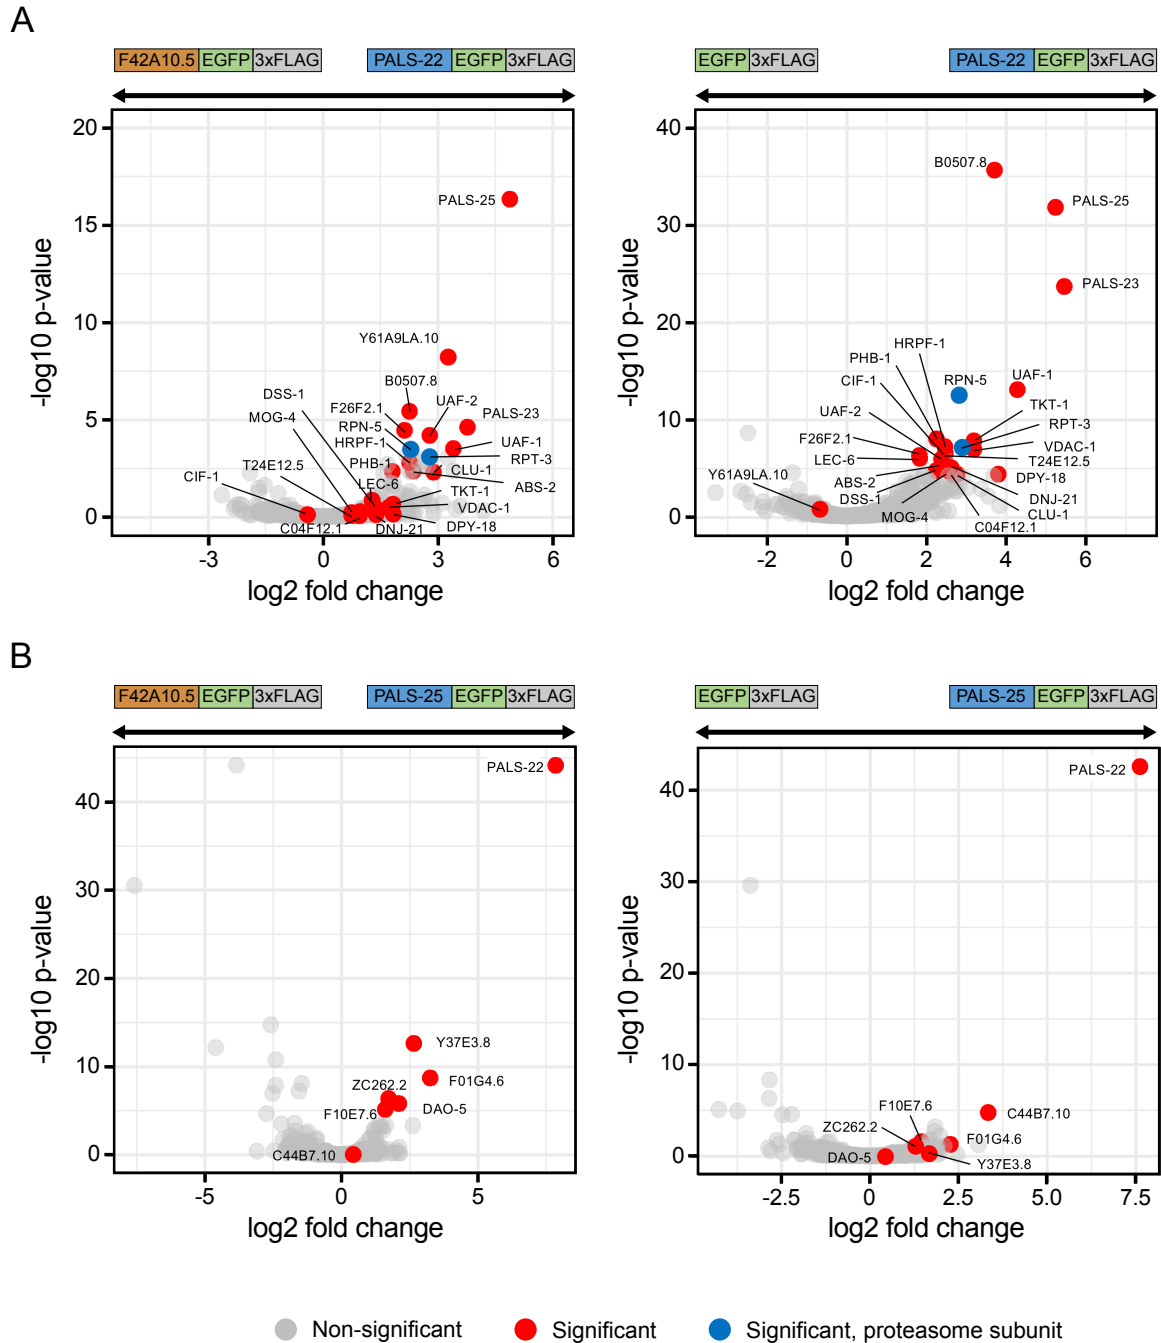

**Fig. S3.** Co-immunoprecipitation mass spectrometry analysis identifies binding partners for PALS-22 and PALS-25. Volcano plot of proteins significantly enriched in PALS-22 (A) and PALS-25 (B) IP's compared to F42A10.5 IP or GFP IP. Proteins significantly more abundant compared to either of the control IP's (GFP alone control or F42A10.5 control, at adjusted  $P < 0.05$  and  $\log_2$  fold change  $> 1$ ) were considered interacting proteins (Dataset S1). Gray dots indicate non-significant proteins, red dots indicate significant proteins and blue dots indicate significant proteasome subunits.

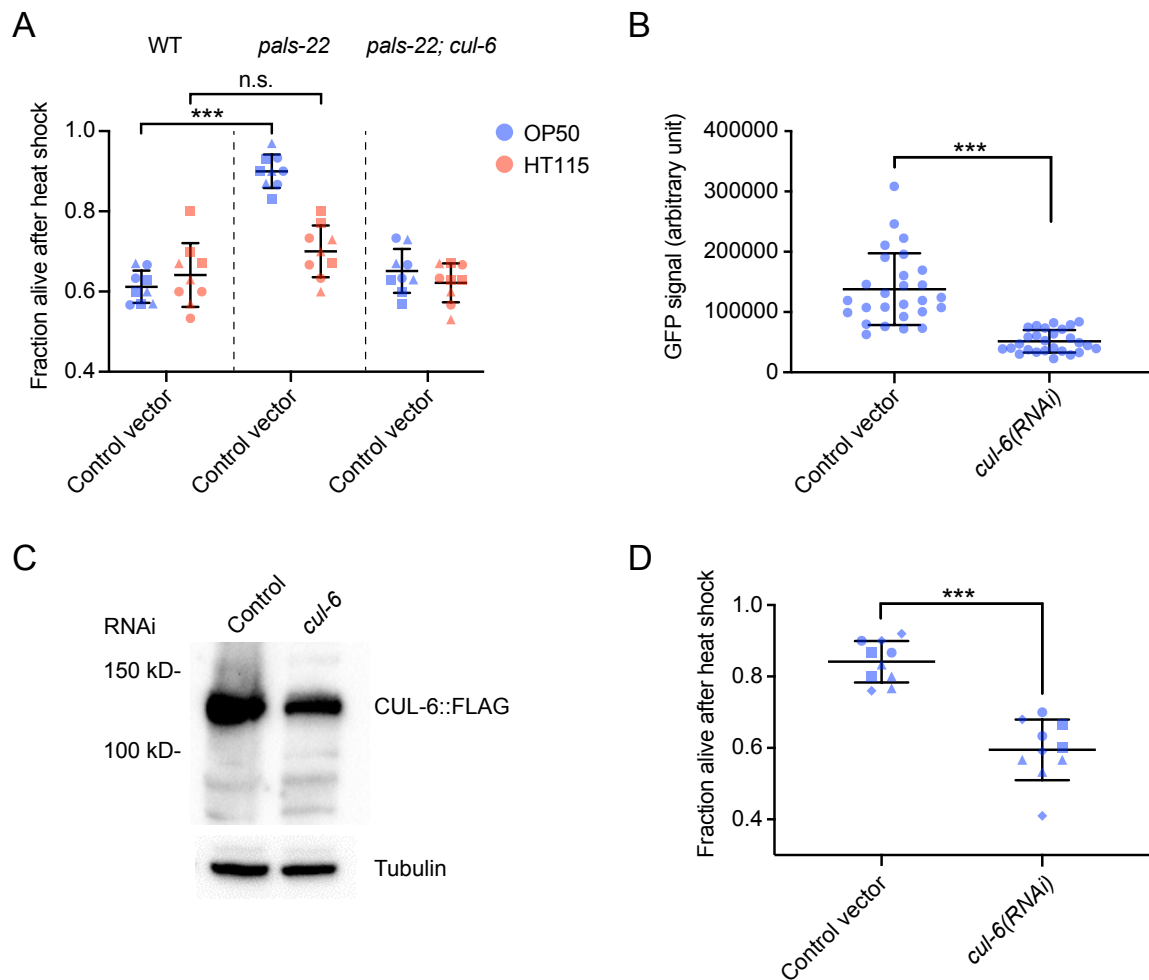

**Fig. S4.** Development of an RNAi system for analyzing thermotolerance in *pals-22* mutants. (A) Survival of animals after 2 h of 37.5°C heat shock treatment, followed by 24 h at 20°C either fed on OP50 strain (R)OP50 or HT115 *E. coli*. Each dot represents a plate, and different shapes represent the experimental replicates done on different days. Mean fraction alive of the nine replicates is indicated by black bar with errors bars as SD. \*\*\*  $P < 0.001$  with Student's t-test. (B) Quantification of GFP signal in L4 animal expressing CUL-6::GFP grown on (R)OP50 expressing either L4440 (control vector) or *cul-6* RNAi. GFP signal was measured with ImageJ in the pharynx and the first intestinal cells ring together with 3 adjacent background area and the Total Corrected Fluorescence (TCF) was calculated. Error bars are SD. \*\*\*  $P < 0.001$  with Student's t-test. (C) Western blot analysis on total protein lysate from adult animals with fosmid transgenes expressing CUL-6::GFP::3XFLAG treated with control or *cul-6* RNAi (OP50). CUL-6::GFP::3XFLAG protein was detected with anti-FLAG, and anti-tubulin antibody was used as a loading control. (D) Survival of *pals-22* mutants after 2 h of 37.5°C heat shock treatment, followed by 24 h at 20°C. Animals were fed on (R)OP50 expressing either L4440 (control vector) or *cul-6* RNAi. Each dot represents a plate, and different shapes represent the experimental replicates done on different days. Mean fraction alive of the nine replicates is indicated by black bar with errors bars as SD. \*\*\*  $P < 0.001$  with Student's t-test.

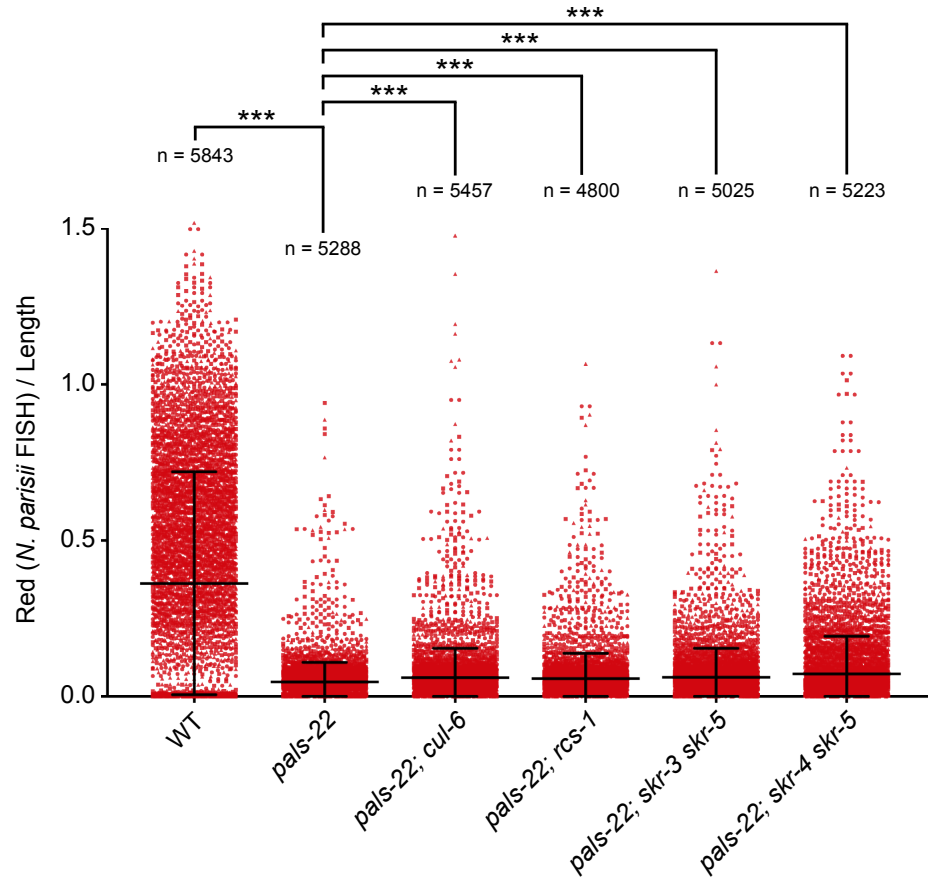

**Fig. S5.** Analysis of pathogen resistance for *pals-22*, *cul-6*, *rsc-1* and *skr* double mutants in a *pals-22* mutant background. *N. parisii*-specific FISH probe (red) was quantified using a COPAS Biosort machine as mean red fluorescence normalized by length of individual animals. Strains were tested in triplicate infection experiments, three plates per experiment, approximately 1200 animals per plate. Each dot represents an individual animal and different shapes represent infection experiments conducted on different days. The number of animals analyzed across three separate infections is indicated for each strain. \*\*\*  $P < 0.001$ , Student's t-test as compared to *pals-22* mutants. Error bars indicate mean and SD.

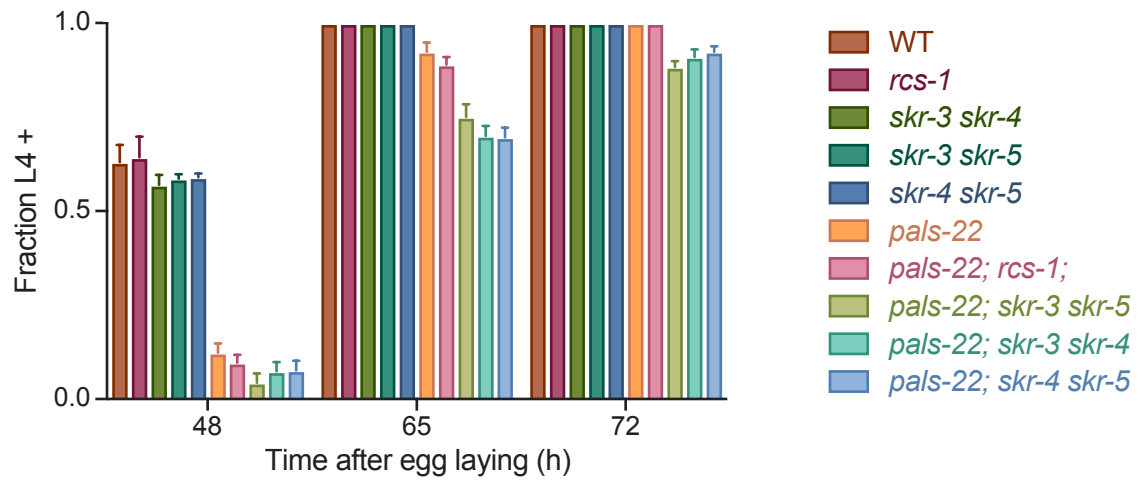

**Fig. S6.** Analysis of developmental timing for *pals-22*, *rcs-1* and *skr* mutants. *skr* double and triple mutants in *pals-22* background do not suppress the developmental delay of *pals-22* mutants. Percentage of animals reaching the L4 larval stage at time points after eggs were laid is indicated. Results shown are the average of 3 independent biological replicates, with 100 animals assayed in each replicate.

**Table S1.** List of *C. elegans* strains used in this publication.

| Strain Name | Genotype (transgene or mutant allele details)                                                    | Source                                |
|-------------|--------------------------------------------------------------------------------------------------|---------------------------------------|
| N2          | Wild type                                                                                        | Caenorhabditis Genetics Center        |
| EG6699      | <i>ttTi5605 II; unc-119(ed3) III</i>                                                             | (Frøkjær-Jensen <i>et al.</i> , 2012) |
| RB2266      | <i>skr-5(ok3068) V</i>                                                                           | Caenorhabditis Genetics Center        |
| ERT54       | <i>jyls8[pals-5p::GFP; myo-2::mCherry] X</i>                                                     | (Bakowski <i>et al.</i> , 2014)       |
| ERT356      | <i>pals-22(jy1) III</i>                                                                          | (Reddy <i>et al.</i> , 2017)          |
| ERT365      | <i>unc-119(ed3) III; jyEx193[pals-22::EGFP::3xFLAG, unc-119(+)]</i>                              | (Reddy <i>et al.</i> , 2017)          |
| ERT413      | <i>jySi21[pET555(spp-5p::strepII3xFLAG GFP::let858 3'UTR; unc-119(+))] II; unc-119(ed3) III</i>  | This paper                            |
| ERT422      | <i>unc-119(ed3) III; jyEx224[cul-6::EGFP::3xFLAG, unc-119(+)]</i>                                | (Reddy <i>et al.</i> , 2017)          |
| ERT441      | <i>pals-22(jy1) III; cul-6(ok1614) IV</i>                                                        | (Reddy <i>et al.</i> , 2017)          |
| ERT443      | <i>jySi22[pET592(myo-2p::GFP::APX-NLS::unc-54; unc-119(+))] II; unc-119(ed3) III</i>             | (Reddy <i>et al.</i> , 2017)          |
| ERT465      | <i>unc-119(ed3) III; jyEx237[pals-25::EGFP::3xFLAG, unc-119(+)]</i>                              | (Reddy <i>et al.</i> , 2019)          |
| ERT479      | <i>pals-22(jy3) III; skr-4(gk759439) V</i>                                                       | (Reddy <i>et al.</i> , 2017)          |
| ERT488      | <i>unc-119(ed3) III; jyEx253[F42A10.5::EGFP::3xFLAG, unc-119(+)]</i>                             | (Reddy <i>et al.</i> , 2017)          |
| ERT554      | <i>pals-22(jy1) III; skr-3(ok365) V</i>                                                          | (Reddy <i>et al.</i> , 2017)          |
| ERT555      | <i>pals-22(jy1) III; skr-5(ok3068) V</i>                                                         | (Reddy <i>et al.</i> , 2017)          |
| ERT571      | <i>jySi42[pET499(vha-6p::GFP::cul-6::unc-54 3' UTR, unc-119(+))] II; unc-119(ed3) III</i>        | This paper                            |
| ERT638      | <i>jySi42 II; unc-119(ed3) pals-22(jy1) III; cul-6(ok1614) IV</i>                                | This paper                            |
| ERT691      | <i>rsc-1(jy84) X</i>                                                                             | This paper                            |
| ERT692      | <i>pals-22(jy1) III; rcs-1(jy84) X</i>                                                           | This paper                            |
| ERT694      | <i>skr-3(ok365) skr-5(ok3068) V</i>                                                              | This paper                            |
| ERT717      | <i>skr-3(ok365) skr-4(gk759439) V</i>                                                            | This paper                            |
| ERT718      | <i>skr-5(ok3068) skr-4(gk759439) V</i>                                                           | This paper                            |
| ERT720      | <i>pals-22(jy1) III; skr-3(ok365) skr-4(gk759439) V</i>                                          | This paper                            |
| ERT721      | <i>pals-22(jy1) III; skr-3(ok365) skr-5(ok3068) V</i>                                            | This paper                            |
| ERT722      | <i>pals-22(jy1) III; cul-6(ok1614) IV; rcs-1(jy84) X</i>                                         | This paper                            |
| ERT723      | <i>rsc-1(jy105) X</i>                                                                            | This paper                            |
| ERT724      | <i>pals-22(jy1) III; rcs-1(jy105) X</i>                                                          | This paper                            |
| ERT727      | <i>pals-22(jy1) III; skr-5(ok3068) skr-4(gk759439) V</i>                                         | This paper                            |
| ERT739      | <i>jySi45[pET686(myo-2p::GFP::cul-6::unc-54 3' UTR, unc-119(+))] II; unc-119(ed3) III</i>        | This paper                            |
| ERT740      | <i>jySi46[pET688(vha-6p::GFP::cul-6(K673R)::unc-54 3' UTR, unc-119(+))] II; unc-119(ed3) III</i> | This paper                            |
| ERT741      | <i>jySi45 II; pals-22(jy1) unc-119(ed3) III; cul-6(ok1614) IV</i>                                | This paper                            |
| ERT742      | <i>pals-22(jy1) III; cul-6(ok1614) IV; rcs-1(jy105) X</i>                                        | This paper                            |
| ERT752      | <i>jySi46 II; pals-22(jy1) unc-119(ed3) III; cul-6(ok1614) IV</i>                                | This paper                            |
| ERT817      | <i>jySi42 II; unc-119(ed3) III; skr-3(ok365) skr-5(ok3068) V</i>                                 | This paper                            |
| ERT819      | <i>unc-119(ed3) III; jyEx286[pET711(rcs-1::EGFP::3xFLAG, unc-119(+))]</i>                        | This paper                            |
| ERT820      | <i>unc-119(ed3) III; jyEx287[pET561(skr-5::EGFP::3xFLAG, unc-119(+))]</i>                        | This paper                            |
| ERT852      | <i>fbxa-158(jy145) II</i>                                                                        | This paper                            |
| ERT853      | <i>fbxa-158(jy146) II</i>                                                                        | This paper                            |
| ERT854      | <i>fbxa-158(jy145) II; pals-22(jy1) III</i>                                                      | This paper                            |
| ERT855      | <i>fbxa-158(jy146) II; pals-22(jy1) III</i>                                                      | This paper                            |

**Table S2.** List of DNA constructs used in this publication.

| Construct Name                   | Genotype (transgene or mutant allele details)                       | Source                                |
|----------------------------------|---------------------------------------------------------------------|---------------------------------------|
| pET499                           | <i>vha-6p::SBP_3xFLAG_GFP_cul-6::unc-54 3'UTR</i> in pCFJ150        | This paper                            |
| pET555                           | <i>spp-5p::streplI3xFLAG_GFP::let-858-3'UTR</i> in pCFJ150          | This paper                            |
| pET686                           | <i>myo-2p::SBP_3xFLAG_GFP_cul-6::unc-54 3'UTR</i> in pCFJ150        | This paper                            |
| pET687                           | <i>myo-3p::SBP_3xFLAG_GFP_cul-6::unc-54 3'UTR</i> in pCFJ150        | This paper                            |
| pET688                           | <i>vha-6p::SBP_3xFLAG_GFP_cul-6(K673R)::unc-54 3'UTR</i> in pCFJ150 | This paper                            |
| pCFJ150 - Addgene Plasmid #19329 | <i>pDESTttTi5605[R4-R3]</i>                                         | (Frøkjær-Jensen <i>et al.</i> , 2012) |
| pCFJ601 - Addgene Plasmid #34874 | <i>eft-3p::Mos1</i> transposase                                     | (Frøkjær-Jensen <i>et al.</i> , 2012) |
| pMA122 - Addgene Plasmid #34873  | <i>peel-1</i> negative selection                                    | (Frøkjær-Jensen <i>et al.</i> , 2012) |
| pGH8 - Addgene Plasmid #19359    | <i>rab-3p::mCherry</i>                                              | (Frøkjær-Jensen <i>et al.</i> , 2012) |
| pCFJ90 - Addgene Plasmid #19327  | <i>myo-2p::mCherry</i>                                              | (Frøkjær-Jensen <i>et al.</i> , 2012) |
| pCFJ104 - Addgene Plasmid #19328 | <i>myo-3p::mCherry</i>                                              | (Frøkjær-Jensen <i>et al.</i> , 2012) |
| 873721959883807 G09              | <i>cul-6::EGFP::3xFLAG</i> Fosmid; <i>unc-119</i> selection         | (Sarov <i>et al.</i> , 2012)          |
| 9830596596427236 B12             | <i>pals-22::EGFP::3xFLAG</i> Fosmid; <i>unc-119</i> selection       | (Sarov <i>et al.</i> , 2012)          |
| 18995122782808704 G01            | <i>pals-25::EGFP::3xFLAG</i> Fosmid; <i>unc-119</i> selection       | (Sarov <i>et al.</i> , 2012)          |
| 8218370932910004 G03             | <i>F42A10.5::EGFP::3xFLAG</i> Fosmid; <i>unc-119</i> selection      | (Sarov <i>et al.</i> , 2012)          |
| 2491680425634929 B04             | <i>rscs-1::EGFP::3xFLAG</i> Fosmid; <i>unc-119</i> selection        | (Sarov <i>et al.</i> , 2012)          |
| 5202602939198744 E05             | <i>skr-5::EGFP::3xFLAG</i> Fosmid; <i>unc-119</i> selection         | (Sarov <i>et al.</i> , 2012)          |



**Dataset S1 (separate file).** Statistical analysis of co-IP experiments. Each tab shows the results for one experimental IP, CUL-6, PALS-22 or PALS-25. Each column indicates the fold change or adjusted p-value of the experimental IP relative to either F42A10.5 or GFP control IPs. Proteins indicated as “TRUE” were significantly more abundant in the experimental IP compared to control IPs (adjusted  $P < 0.05$  and  $\log_2$  fold change  $> 1$ ).

**References:**

1. C. Frøkjær-Jensen, M. W. Davis, M. Ailion, E. M. Jorgensen, Improved Mos1-mediated transgenesis in *C. elegans*. *Nat. Methods* **9**, 117–118 (2012).
2. M. Bakowski, et al., Ubiquitin-Mediated Response to Microsporidia and Virus Infection in *C. elegans*. *PLoS Pathog.* **10** (2014).
3. K. C. Reddy, et al., An Intracellular Pathogen Response Pathway Promotes Proteostasis In *C. elegans*. *Curr. Biol.* (2017) <https://doi.org/10.1016/j.cub.2017.10.009> (August 28, 2017).
4. K. C. Reddy, et al., Antagonistic paralogs control a switch between growth and pathogen resistance in *C. elegans*. *PLOS Pathog.* **15**, e1007528 (2019).
5. M. Sarov, et al., A genome scale resource for in vivo tag-based protein function exploration in *C. elegans*. *Cell* **150**, 855–866 (2012).
